# Supplementary material for: Depth profile analyses by femtosecond laser ablation (multicollector) inductively coupled plasma mass spectrometry for resolving chemical and isotopic gradients in minerals
Source: Copernicus journal article supplement (doi:10.5194/ejm-35-813-2023), 2023-10-04
Supplement: Supplementary file 1 [file ejm-35-813-2023-supplement.zip]

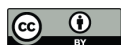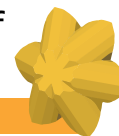

*Supplement of*

**Depth profile analyses by femtosecond laser ablation (multicollector) inductively coupled plasma mass spectrometry for resolving chemical and isotopic gradients in minerals**

**Martin Oeser et al.**

*Correspondence to:* Martin Oeser ([m.oeser@mineralogie.uni-hannover.de](mailto:m.oeser@mineralogie.uni-hannover.de))

- [ejm-35-813-2023-supplement-title-page.pdf](#)
- [revised-Supplement\\_EJM\\_Oeser-et-al-2023.xlsx](#)

The copyright of individual parts of the supplement might differ from the article licence.
