# Supplementary material for: Depth profile analyses by femtosecond laser ablation (multicollector) inductively coupled plasma mass spectrometry for resolving chemical and isotopic gradients in minerals
Source: Copernicus journal article supplement (doi:10.5194/ejm-35-813-2023), 2023-10-04
Supplement: Supplementary file 1 [file revised-Supplement_EJM_Oeser-et-al-2023.xlsx]

## Sheet: Table S1
Table S1: Fe- and Mg isotopic data acquired by fs-LA depth profile analyses in a thin film − San Carlos olivine couple
depth (µm)	δ56Fe (‰, IRMM-14)	2 σ a	δ57Fe (‰, IRMM-14)	2 σ		depth (µm)	δ25Mg (‰, DSM-3)	2 σ a	δ26Mg (‰, DSM-3)	2 σ	comment
0.396612	3.85685	0.115994	140.277	2.69447		0.305518	31.0829	2.37044	16.6261	1.38131	thin film
1.18984	0.15101	0.11868	0.540583	0.224063		0.916554	-0.0760982	0.071861	-0.189311	0.0678937
1.98306	0.108785	0.0941596	0.15346	0.164818		1.52759	0.0152074	0.067114	-0.0611074	0.0680758
2.77629	0.0767747	0.0899911	0.0848288	0.152611		2.13863	-0.0821884	0.0650154	-0.1185	0.0671851
3.56951	0.0198503	0.0849722	0.110639	0.168039		2.74966	-0.0964077	0.0650188	-0.260154	0.0686974
4.36274	-0.0231096	0.0870299	0.0373168	0.177562		3.3607	-0.120502	0.0626246	-0.348466	0.0693938
5.15596	0.109646	0.0904053	0.0807303	0.177037		3.97173	-0.1428	0.0672611	-0.29729	0.0712307
5.94919	0.00812418	0.0838391	-0.038103	0.165521		4.58277	-0.198016	0.0613218	-0.420858	0.0682782
6.74241	0.039323	0.0905744	0.0566834	0.165432		5.1938	-0.1625	0.0631213	-0.441824	0.0732387
7.53564	0.0870167	0.0872081	-0.0670801	0.174269		5.80484	-0.122345	0.062965	-0.320706	0.0685403
						6.41588	-0.203026	0.0685495	-0.432612	0.0726331
						7.02691	-0.18015	0.0654128	-0.430117	0.0677075
						7.63795	-0.068324	0.0610136	-0.138462	0.0671009
a internal 2s-precision as calculated using Eq. (3)

## Sheet: Table S2
Table S2: EPMA data for olivine standards and the large "reference" San Carlos olivine crystal
Session	Sample	SiO2 (wt.%)	FeO (wt.%)	MgO (wt.%)	NiO (wt.%)	CaO (wt.%)	Sum (wt.%)
1	STD SC-OL B3	40.6053	9.6739	49.1671	0.399224	0.0798903	99.9255
1	STD SC-OL B3	40.8747	9.4487	49.1871	0.349141	0.0915997	99.9512
1	STD SC-OL B3	41.114	9.69349	48.9468	0.314641	0.112278	100.181
1	STD SC-OL B3	40.5954	9.74244	49.1471	0.312299	0.116347	99.9135
1	STD SC-OL B3	40.8747	9.66411	49.037	0.329414	0.0752397	99.9804
1	STD SC-OL B3	41.0741	9.53682	49.3673	0.384541	0.0924302	100.455
2	STD SC-OL B3	39.8287	9.86792	49.2673	0.43202	0.0671766	99.4631
2	STD SC-OL B3	39.7979	9.94687	49.2774	0.434436	0.0808067	99.5374
2	STD SC-OL B3	39.7569	10.0357	49.3887	0.422355	0.0840751	99.6876
2	STD SC-OL B3	39.8389	9.92713	49.2572	0.35651	0.0816412	99.4614
2	STD SC-OL B3	39.6338	9.71004	49.3381	0.400205	0.0755911	99.1577
3	STD SC-OL B3	40.2952	9.70669	49.2611	0.345951	0.085233	99.6943
3	STD SC-OL B3	40.495	9.84607	49.4619	0.34326	0.0679543	100.214
3	STD SC-OL B3	40.485	9.76643	49.6727	0.365624	0.0720806	100.362
3	STD SC-OL B3	40.565	9.96554	49.7932	0.3479	0.0713069	100.743
3	STD SC-OL B3	40.7248	9.88589	49.8133	0.355973	0.0944527	100.874
3	STD SC-OL B3	40.8746	10.0651	49.8735	0.369244	0.0825252	101.265
		40.4373	9.79311	49.368	0.368396	0.0841546	100.051	mean
		0.491251	0.170273	0.272543	0.0381856	0.0139445		1 SD
		40.81	9.55	49.42	0.37	<0.05	100.29	reference values (Jarosewich et al. 1980)
Session	Sample	SiO2 (wt.%)	FeO (wt.%)	MgO (wt.%)	NiO (wt.%)	CaO (wt.%)	Sum (wt.%)
1	STD MongOL	40.72	10.25	48.62	0.3953	0.1322	100.118
1	STD MongOL	40.96	10.32	48.79	0.4103	0.1084	100.589
1	STD MongOL	41.37	10.51	48.92	0.4212	0.1168	101.338
1	STD MongOL	40.92	10.53	48.64	0.3952	0.1238	100.609
1	STD MongOL	40.56	10.27	48.64	0.3776	0.087	99.9346
1	STD MongOL	40.54	10.44	48.79	0.3925	0.1273	100.29
2	STD MongOL	39.54	10.55	48.18	0.3688	0.1133	98.7521
2	STD MongOL	39.55	10.75	48.48	0.3459	0.1033	99.2292
2	STD MongOL	39.62	10.53	48.61	0.358	0.1194	99.2374
2	STD MongOL	39.15	10.52	48.33	0.3157	0.1337	98.4494
2	STD MongOL	39.66	10.65	48.53	0.4044	0.1055	99.3499
3	STD MongOL	40.43	10.45	48.62	0.387	0.1195	100.007
3	STD MongOL	40.44	10.6	48.6	0.3387	0.1407	100.119
3	STD MongOL	40.69	10.5	48.83	0.3831	0.1227	100.526
3	STD MongOL	40.44	10.35	48.87	0.4445	0.1319	100.236
3	STD MongOL	40.59	10.61	48.85	0.377	0.1138	100.541
3	STD MongOL	40.8	10.53	48.91	0.4038	0.1159	100.76
		40.3518	10.4918	48.6594	0.383471	0.118541	100.005	mean
		0.617345	0.134175	0.204892	0.0316623	0.0131557		1 SD
		40.74	10.17	48.79	0.359	0.096	100.155	reference values (Batanova et al. 2019)
Line	Sample	SiO2 (wt.%)	FeO (wt.%)	MgO (wt.%)	NiO (wt.%)	CaO (wt.%)	Sum (wt.%)	Mg#	distance (µm)
1	ref-SC-OL	40.8268	8.6305	50.0059	0.380673	0.0679593	99.9118	0.911687	1
1	ref-SC-OL	41.3558	8.61075	50.2682	0.404534	0.0720577	100.711	0.912291	25.4465
1	ref-SC-OL	41.5217	8.749	49.6125	0.40534	0.0492556	100.338	0.909938	49.893
1	ref-SC-OL	41.4387	8.57125	50.4397	0.323184	0.0704183	100.843	0.912929	74.3394
1	ref-SC-OL	41.1794	8.56138	50.016	0.372417	0.0652767	100.194	0.912348	98.7859
1	ref-SC-OL	41.2935	8.75887	50.0059	0.312009	0.0486594	100.419	0.910491	123.232
1	ref-SC-OL	41.3454	8.7095	50.3085	0.30778	0.0511185	100.722	0.911439	147.679
1	ref-SC-OL	41.1172	8.84774	50.1572	0.358624	0.0725048	100.553	0.909913	172.125
1	ref-SC-OL	41.6669	8.71937	49.8546	0.321775	0.0695986	100.632	0.910612	196.572
1	ref-SC-OL	41.3558	8.67	49.8546	0.38611	0.0917301	100.358	0.911073	221.018
1	ref-SC-OL	41.169	8.77862	49.784	0.428698	0.0836823	100.244	0.909943	245.465
1	ref-SC-OL	41.5528	8.80824	50.0765	0.316237	0.0719832	100.826	0.910147	269.911
1	ref-SC-OL	40.9097	8.79837	50.1673	0.454774	0.0617744	100.392	0.910387	294.358
1	ref-SC-OL	41.0964	8.86749	50.0362	0.329729	0.064457	100.394	0.909531	318.804
1	ref-SC-OL	41.0757	8.71937	49.7537	0.351778	0.0748893	99.9754	0.910447	343.251
1	ref-SC-OL	41.6047	8.87737	49.9151	0.358624	0.0706419	100.826	0.90924	367.697
1	ref-SC-OL	41.501	8.90699	50.2884	0.3847	0.0789132	101.16	0.909579	392.144
1	ref-SC-OL	41.6877	8.78849	50.1774	0.32842	0.0770503	101.059	0.910495	416.59
1	ref-SC-OL	41.3765	8.73912	50.0362	0.382082	0.0529814	100.587	0.910724	441.037
1	ref-SC-OL	41.1794	8.93661	50.248	0.402823	0.051342	100.818	0.90924	465.483
1	ref-SC-OL	41.584	8.84774	49.8445	0.351778	0.0580485	100.686	0.909399	489.93
1	ref-SC-OL	41.2728	8.76874	49.9857	0.365772	0.0765287	100.47	0.910366	514.376
1	ref-SC-OL	41.5217	8.591	50.0664	0.36839	0.0650531	100.613	0.912153	538.822
1	ref-SC-OL	41.2831	8.76874	50.1673	0.368289	0.0767522	100.664	0.910662	563.269
1	ref-SC-OL	41.252	8.591	49.7033	0.318855	0.0773484	99.9425	0.911567	587.715
1	ref-SC-OL	41.3246	8.82799	50.0059	0.360033	0.0786152	100.597	0.909848	612.162
1	ref-SC-OL	41.4284	8.76874	49.8344	0.374934	0.0716106	100.478	0.910118	636.608
1	ref-SC-OL	41.3454	8.82799	50.2884	0.369699	0.0508204	100.882	0.910309	661.055
1	ref-SC-OL	41.4387	8.61075	49.8748	0.387519	0.0652767	100.377	0.91166	685.501
1	ref-SC-OL	41.3558	8.64037	50.0563	0.375236	0.0642334	100.492	0.911676	709.948
1	ref-SC-OL	41.1276	8.83787	49.8041	0.343522	0.0382271	100.151	0.909424	734.394
1	ref-SC-OL	41.2209	8.49225	50.0866	0.428798	0.064755	100.293	0.913107	758.841
1	ref-SC-OL	41.6462	8.86749	50.0362	0.381982	0.0745913	101.006	0.909531	783.287
1	ref-SC-OL	41.4491	8.78849	49.8748	0.332346	0.0574524	100.502	0.910001	807.734
1	ref-SC-OL	41.4802	8.62062	49.784	0.370806	0.0705673	100.326	0.911421	832.18
1	ref-SC-OL	40.9305	8.79837	49.8445	0.339394	0.0700457	99.9828	0.909859	856.627
1	ref-SC-OL	41.0757	8.90699	50.1875	0.352885	0.0564092	100.579	0.909414	881.073
1	ref-SC-OL	38.9908	8.68975	49.5015	0.372014	0.098064	97.6521	0.91031	905.52
1	ref-SC-OL	41.0861	8.5515	50.0059	0.377451	0.0716106	100.093	0.912425	929.966
1	ref-SC-OL	40.9616	8.76874	50.5002	0.371914	0.0704928	100.673	0.911198	954.413
1	ref-SC-OL	43.9904	8.67	38.6973	0.344529	0.247768	91.95	0.888298	978.859
1	ref-SC-OL	41.3869	8.77862	50.0362	0.345838	0.0517891	100.599	0.910357	1003.31
1	ref-SC-OL	41.3039	8.73912	50.1471	0.38017	0.0652021	100.636	0.910904	1027.75
1	ref-SC-OL	41.6462	8.95636	50.1572	0.406447	0.0809997	101.247	0.908908	1052.2
1	ref-SC-OL	39.9658	8.68975	48.7651	0.353791	0.0754855	97.8499	0.909079	1076.64
1	ref-SC-OL	41.2105	8.6305	49.8949	0.411985	0.0646805	100.213	0.911508	1101.09
1	ref-SC-OL	41.5425	8.86749	50.016	0.339193	0.0756345	100.841	0.909498	1125.54
1	ref-SC-OL	40.8164	8.72925	49.9555	0.326608	0.0595389	99.8872	0.910685	1149.98
1	ref-SC-OL	40.0592	8.64037	46.8282	0.421147	0.118258	96.0672	0.906159	1174.43
1	ref-SC-OL	43.7622	8.07751	30.4656	0.329125	0.211851	82.8463	0.870466	1198.88
1	ref-SC-OL	41.1587	8.72925	50.127	0.362248	0.0584956	100.436	0.910963	1223.32
1	ref-SC-OL	41.3661	8.6305	50.2783	0.40101	0.0553659	100.731	0.912123	1247.77
1	ref-SC-OL	41.1379	8.5515	49.8445	0.459707	0.0555895	100.049	0.912166	1272.22
1	ref-SC-OL	41.0549	8.69962	50.0261	0.407555	0.0537266	100.242	0.911075	1296.66
1	ref-SC-OL	40.806	8.85762	50.7322	0.354093	0.0750384	100.825	0.910752	1321.11
1	ref-SC-OL	41.0757	8.72925	49.8647	0.342817	0.0635628	100.076	0.910537	1345.56
1	ref-SC-OL	40.806	8.61075	50.7928	0.289456	0.104398	100.603	0.913118	1370
1	ref-SC-OL	41.1172	8.66012	49.9958	0.366477	0.078019	100.218	0.911394	1394.45
1	ref-SC-OL	41.1276	8.79837	50.0664	0.404836	0.0750384	100.472	0.910223	1418.9
1	ref-SC-OL	41.2002	8.76874	49.7638	0.348657	0.051044	100.132	0.910002	1443.34
2	ref-SC-OL	40.4845	8.67987	49.905	0.398191	0.0633392	99.5309	0.911063	1
2	ref-SC-OL	40.2666	8.7095	49.6629	0.391244	0.0673631	99.0976	0.910391	22.1641
2	ref-SC-OL	40.64	8.69962	49.5217	0.308888	0.0970208	99.2673	0.910251	43.3283
2	ref-SC-OL	40.6919	8.72925	49.7638	0.329527	0.0681828	99.5827	0.910371	64.4924
2	ref-SC-OL	40.7023	8.71937	49.5015	0.413495	0.0751129	99.4118	0.910032	85.6565
2	ref-SC-OL	40.6193	8.90699	49.9353	0.358322	0.0697477	99.8896	0.908998	106.821
2	ref-SC-OL	40.5882	8.65025	49.7537	0.347448	0.0681828	99.4078	0.911094	127.985
2	ref-SC-OL	40.8268	8.71937	49.7941	0.360033	0.0575269	99.7577	0.910513	149.149
2	ref-SC-OL	40.6297	8.7095	49.6629	0.329527	0.0502243	99.3818	0.910391	170.313
2	ref-SC-OL	40.9201	8.62062	49.8849	0.371008	0.0551424	99.8517	0.911584	191.477
2	ref-SC-OL	40.972	8.83787	47.8269	0.452962	0.0606566	98.1504	0.906031	212.641
2	ref-SC-OL	40.7749	8.57125	49.6226	0.331239	0.0743677	99.3743	0.911622	233.805
2	ref-SC-OL	40.6089	8.72925	49.7335	0.355805	0.0577505	99.4853	0.910322	254.97
2	ref-SC-OL	40.5778	8.57125	49.8142	0.337884	0.0606566	99.3618	0.911932	276.134
2	ref-SC-OL	40.9305	8.71937	49.7134	0.410474	0.0593153	99.833	0.910381	297.298
2	ref-SC-OL	40.9201	8.67987	49.7335	0.288349	0.0697477	99.6916	0.910784	318.462
2	ref-SC-OL	40.9408	8.52188	49.8445	0.342012	0.0730264	99.7223	0.912444	339.626
2	ref-SC-OL	41.0238	8.75887	49.9857	0.352684	0.0782426	100.199	0.910458	360.79
2	ref-SC-OL	40.9097	8.56138	49.6226	0.373525	0.0553659	99.5226	0.911715	381.954
2	ref-SC-OL	40.8682	8.72925	49.7739	0.383391	0.0676612	99.8224	0.910388	403.118
2	ref-SC-OL	40.9823	8.62062	49.8445	0.283114	0.0604331	99.791	0.911519	424.283
2	ref-SC-OL	40.7645	8.49225	49.8344	0.323889	0.0660218	99.4811	0.912705	445.447
2	ref-SC-OL	40.6815	8.79837	50.1673	0.351476	0.0766777	100.075	0.910387	466.611
2	ref-SC-OL	40.8475	8.76874	49.6125	0.375941	0.0587937	99.6635	0.909753	487.775
2	ref-SC-OL	41.0238	8.95636	49.784	0.305263	0.0674376	100.137	0.908287	508.939
2	ref-SC-OL	41.0549	8.78849	49.8344	0.3107	0.0545463	100.043	0.909934	530.103
2	ref-SC-OL	41.0238	8.77862	50.0261	0.42457	0.0568563	100.31	0.91034	551.267
2	ref-SC-OL	40.1318	8.45275	48.301	0.367887	0.0938911	97.3474	0.910563	572.431
2	ref-SC-OL	40.9305	8.67987	50.0463	0.413595	0.0777955	100.148	0.911292	593.596
2	ref-SC-OL	41.1587	8.71937	49.9454	0.337582	0.0552914	100.216	0.91076	614.76
2	ref-SC-OL	41.1172	8.591	50.0866	0.348455	0.0434433	100.187	0.912185	635.924
2	ref-SC-OL	40.5052	8.27501	51.3173	0.399198	0.134801	100.632	0.917007	657.088
2	ref-SC-OL	40.9305	8.62062	49.9454	0.320667	0.0819684	99.8991	0.911682	678.252
2	ref-SC-OL	41.3869	8.69962	49.673	0.363356	0.0645315	100.187	0.9105	699.416
2	ref-SC-OL	40.7645	8.6305	49.2493	0.334461	0.0910595	99.0698	0.910452	720.58
2	ref-SC-OL	41.2624	8.4725	49.8949	0.41279	0.0594644	100.102	0.912987	741.744
2	ref-SC-OL	41.1172	8.69962	49.9857	0.294289	0.0634137	100.16	0.91101	762.909
2	ref-SC-OL	41.3558	8.48238	49.9454	0.342716	0.0664689	100.193	0.912975	784.073
2	ref-SC-OL	41.169	8.87737	50.0664	0.400406	0.0618489	100.575	0.909489	805.237
2	ref-SC-OL	41.2313	8.99586	50.1169	0.372518	0.0596879	100.776	0.908476	826.401
2	ref-SC-OL	41.584	8.69962	50.1471	0.419133	0.0612528	100.911	0.911271	847.565
2	ref-SC-OL	41.4595	8.50213	51.509	0.36698	0.066916	101.905	0.915213	868.729
2	ref-SC-OL	41.3143	8.6305	50.5204	0.30919	0.0762306	100.851	0.912508	889.893
2	ref-SC-OL	41.1898	8.66012	49.7941	0.310599	0.0930714	100.048	0.911067	911.057
2	ref-SC-OL	41.0446	8.89712	49.9151	0.298014	0.0603586	100.215	0.909056	932.222
2	ref-SC-OL	40.9097	8.6305	51.2669	0.41722	0.0552914	101.28	0.913672	953.386
2	ref-SC-OL	41.3246	8.95636	50.0563	0.293886	0.0702693	100.702	0.908741	974.55
2	ref-SC-OL	41.0861	8.56138	50.0664	0.392755	0.0799565	100.187	0.912429	995.714
2	ref-SC-OL	41.335	8.83787	50.1673	0.36255	0.0633392	100.766	0.910021	1016.88
2	ref-SC-OL	41.6566	8.69962	49.8041	0.39054	0.0736225	100.624	0.910714	1038.04

## Sheet: Table S3a + 3b
Table S3a: Major, minor and trace element data acquired by fs-LA-sector field-ICP-MS on silicate reference glasses, using BCR2-G and BIR-1G as calibration reference materials (CRM).
CRM used for calibrating the respective element		BCR-2G		BCR-2G		BCR-2G		BCR-2G		BCR-2G		BCR-2G		BCR-2G		BCR-2G		BIR-1G		BCR-2G		BCR-2G		BCR-2G		BIR-1G		BCR-2G		BCR-2G		BCR-2G		BCR-2G
Sample	Analysis #	Li (µg/g)	LOD Li (µg/g) a	Mg (µg/g)	LOD Mg (µg/g)	Al (µg/g)	LOD Al (µg/g)	P (µg/g)	LOD P (µg/g)	Ca (µg/g)	LOD Ca (µg/g)	Sc (µg/g)	LOD Sc (µg/g)	Ti (µg/g)	LOD Ti (µg/g)	V (µg/g)	LOD V (µg/g)	Cr (µg/g)	LOD Cr (µg/g)	Mn (µg/g)	LOD Mn (µg/g)	Fe (µg/g)	LOD Fe (µg/g)	Co (µg/g)	LOD Co (µg/g)	Ni (µg/g)	LOD Ni (µg/g)	Y (µg/g)	LOD Y (µg/g)	Zr (µg/g)	LOD Zr (µg/g)	Yb (µg/g)	LOD Yb (µg/g)	Lu (µg/g)	LOD Lu (µg/g)
ARM-1	1	476.4	0.947446	20801.8	8.04311	66999.5	11.6138	1208.25	6.84005	35406.6	158.778	424.055	0.319087	5728.4	6.09142	559.87	0.325032	443.263	10.1933	357.089	1.61519	41819.4	52.4818	460.747	0.466198	437.159	6.23977	446.993	0.187586	431.027	0.166467	438.832	0.186249	428.907	0.133997
ARM-1	2	488.696	0.763137	21459.3	8.15073	67980.6	13.9105	1221.16	6.47584	36180.2	136.864	433.148	0.234694	5804.41	6.82645	563.498	0.150729	437.338	8.55784	358.047	1.18267	43138.7	21.351	469.021	0.333479	449.307	5.41717	455.55	0.0460237	441.665	0.0828311	449.179	0.0616948	437.785	0.0992555
ARM-1	3	480.184	0.571495	20989.5	15.6097	65471	25.8723	1215.63	5.35852	35676.2	105.427	417.952	0.223093	5675.08	5.56927	561.178	0.506512	429.42	7.00653	354.348	1.59349	43621.4	31.1196	473.24	0.47871	453.138	3.66146	452.054	0.299395	431.117	0.379758	434.076	0.408367	403.634	0.169527
ARM-1	4	479.412	0.634617	21260.4	12.8956	66252.2	22.7956	1202.81	5.43402	35839.9	141.227	419.32	0.21118	5763.7	7.9633	562.488	0.209306	426.13	9.87084	348.107	1.50899	43186.7	38.4413	471.909	0.342267	450.482	3.82976	454.435	0.044527	431.524	0.0915092	439.241	0.0843813	401.681	0.0154276
ARM-1	5	496.101	0.408358	21405.9	8.91145	69047.3	26.9956	1224.61	4.63309	37044	107.078	443.826	0.239189	5936.15	5.11653	571.891	0.197439		8.29065	364.337	0.892753	43691.9	22.8686	475.065	0.275264		2.99672		0.209807	459.91	0.143186	466.143	0.263286	458.804	0.18656
ARM-1	6	491.481	0.495275	21462.3	9.00761	68847.8	19.095	1211.78	3.78247	36515.1	94.2825	436.108	0.1759	5861.6	4.87657	565.241	0.200401		5.78758	360.973	1.18135	43396.6	35.7776	473.762	0.258372		3.18177		0.107912	454.078	0.140669	469.449	0.167155	456.958	0.0759189
ARM-1	7	494.55	0.430954	21355.1	16.1375	67879.6	21.7841	1215.29	3.65668	36210.6	90.5785	433.922	0.213632	5812.68	4.77759	574.025	0.263774		8.70447	356.921	0.894864	43754.5	26.8465	476.586	0.272046		2.40278		0.124465	443.76	0.227657	458.338	0.320912	454.249	0.289169
ARM-1	8	493.566	0.403263	21421.6	16.1874	67675	12.3151	1213.93	3.68828	36642.5	124.154	434.965	0.184783	5863.34	6.69059	571.141	0.113166		8.88227	356.842	1.02531	43803.9	20.8946	478.057	0.234669		2.75072		0.0323553	447.248	0.164655	461.473	0.095356	459.539	0.105444
mean		487.549		21269.5		67519.1		1214.18		36189.4		430.412		5805.67		566.167		434.038		357.083		43301.6		472.298		447.521		452.258		442.541		452.091		437.695
2 SD		15.4896		489.568		2453.89		13.7559		1079.82		18.0732		166.157		10.8313		15.4858		9.46623		1300.06		10.8644		14.1838		7.60179		21.9568		27.2529		48.4161
ARM-1 Reference Value b		511		22795		70391.2		1134.71		36235.1		428		5873.62		575		463		309.785		44462.1		497		473		449		437		460		446
ARM-3	1	18.0748	0.220146	20351.2	6.62869	73045.9	25.823			36263.1	69.1261	7.02896	0.0838202			11.1186	0.0369778	13.6614	5.2891	382.862	0.654433	46788.6	20.5105			15.4921	1.7968	7.42324	0.0179166			9.33506	0.0457541	6.98976	0.0100238
ARM-3	2	18.2743	0.236417	20342.8	5.79467	72715.7	11.8483			36344.7	60.2704	7.13574	0.076623			10.9883	0.0461501	12.3886	4.23822	383.007	0.602623	46810.8	16.2633			15.5378	1.66338	7.39562	0.0135223			9.13167	0.016505	6.91188	0.010466
ARM-3	3	18.2384	0.203285	20561.8	25.7318	73096.3	7.55062			36587.7	56.6742	7.04322	0.109377			10.9813	0.0505371	12.8334	4.39858	383.779	0.654226	46798.9	13.6651			14.8481	1.85559	7.51337	0.0242199			9.50447	0.026242	6.97697	0.0117061
ARM-3	4	17.5631	0.118979	20592.7	6.99063	73279	3.21461			36687.3	63.799	6.89772	0.0834678			11.2794	0.0511245	11.5239	4.98721	374.974	0.569136	46618.7	13.9807			13.2642	1.2833	7.97194	0.00487952			9.57633	0.0103411	6.98265	0.000567183
ARM-3	5	17.539	0.0828665	20525.6	6.62158	72671.2	1.6004			36288	55.734	6.6792	0.0758583			11.361	0.0346165	10.8378	3.14996	370.239	0.47262	46303.7	7.99811			12.8627	1.09115	7.91478	0.00403265			9.54564	0.00768749	7.00884	0.00110957
ARM-3	6	17.7697	0.0938481	20671.5	8.75551	73094.4	1.07899			36544.5	54.993	6.7681	0.0752656			11.309	0.033019	13.8174	3.14683	374.202	0.442945	46535.5	9.64921			13.0313	0.788311	7.97256	0.00408954			9.80851	0.00480941	7.15696	0.000524638
ARM-3	7	17.8628	0.0937345	20735.3	8.75057	73362.3	1.07829			36441.4	54.9391	6.76164	0.0751952			11.3845	0.0329817	12.7149	3.14438	375.874	0.442663	46558.6	9.6435			12.6253	0.788012	8.02286	0.0040855			9.75701	0.00480521	7.16749	0.000524153
ARM-3	8	17.853	0.140326	20444	1.71163	71433.3	2.22138			36171.9	36.7368	6.52294	0.0592877			10.8954	0.0241373	9.94064	2.33789	368.357	0.346494	46189.7	7.56808			13.0047	0.884986	7.81047	0.0057138			9.22274	0.00414719	6.83542	0.00130168
ARM-3	9	17.7451	0.128607	20601.3	1.04184	71412	2.31917			36183.7	29.2975	6.4613	0.0424241			10.8919	0.0205937	12.1626	1.49224	370.849	0.222924	46603.8	4.50588			13.2925	0.944437	7.83567	0.00307187			9.39002	0.0040982	6.83616	0.000686558
ARM-3	10	17.199	0.0774174	20528.1	4.21882	71925.6	1.27006			35351.4	51.8315	6.53776	0.0594007			10.769	0.0298897	11.4149	2.59123	366.367	0.369642	46014.3	6.56769			12.8011	0.946159	7.82642	0.00480824			9.1823	0.00195062	6.70048	0.000357496
ARM-3	11	17.4774	0.0785194	20570.1	4.28884	72025.5	1.29137			35921.3	52.6725	6.60677	0.0604009			10.7494	0.0303718	12.3508	2.63778	371.526	0.375842	46351.1	6.67918			13.3478	0.962734	7.88961	0.0048875			9.27285	0.0019795	6.80996	0.000362666
ARM-3	12	17.5631	0.118979	20592.7	6.99063	73279	3.21461			36687.3	63.799	6.89772	0.0834678			11.2794	0.0511245	11.5239	4.98721	374.974	0.569136	46618.7	13.9807			13.2642	1.2833	7.97194	0.00487952			9.57633	0.0103411	6.98265	0.000567183
ARM-3	13	17.539	0.0828665	20525.6	6.62158	72671.2	1.6004			36288	55.734	6.6792	0.0758583			11.361	0.0346165	10.8378	3.14996	370.239	0.47262	46303.7	7.99811			12.8627	1.09115	7.91478	0.00403265			9.54564	0.00768749	7.00884	0.00110957
ARM-3	14	17.7697	0.0938481	20671.5	8.75551	73094.4	1.07899			36544.5	54.993	6.7681	0.0752656			11.309	0.033019	13.8174	3.14683	374.202	0.442945	46535.5	9.64921			13.0313	0.788311	7.97256	0.00408954			9.80851	0.00480941	7.15696	0.000524638
ARM-3	15	17.8628	0.0937345	20735.3	8.75057	73362.3	1.07829			36441.4	54.9391	6.76164	0.0751952			11.3845	0.0329817	12.7149	3.14438	375.874	0.442663	46558.6	9.6435			12.6253	0.788012	8.02286	0.0040855			9.75701	0.00480521	7.16749	0.000524153
ARM-3	16	17.2484	0.0930818	20519.9	4.56359	71768.9	1.24328			35362.9	54.0951	6.53976	0.063949			10.7706	0.0294851	11.0563	2.69445	366.421	0.38446	45958.3	6.7569			12.7058	0.938686	7.82244	0.00406391			9.2066	0.00214541	6.70247	0.000370548
ARM-3	17	17.524	0.0650531	20532.2	5.45151	71818	1.05427			35870.2	36.194	6.58054	0.0485004			10.7329	0.0169709	12.5826	2.17294	370.637	0.333428	46223	4.79112			13.1149	0.80777	7.86674	0.00429458			9.27944	0.00306801	6.82803	0.000770283
ARM-3	18	17.4616	0.0818324	20169.3	6.05442	70717.8	1.89251			35291.7	54.6517	6.41322	0.0677026			10.6886	0.0350571	12.1159	3.04905	364.509	0.306488	46014.8	8.82501			13.5764	1.31551	7.66088	0.0055603			9.08119	0.0081839	6.76578	0.00100666
ARM-3	19	17.6284	0.0791202	20403.9	5.85236	71398.7	1.82929			35844.3	52.8267	6.44592	0.0654257			10.9382	0.0338813	13.5609	2.94798	365.328	0.29624	46474.6	8.53096			13.4841	1.27181	7.70304	0.0053731			9.1451	0.00790811	6.87639	0.000973187
mean		17.6944		20530.3		72430.1				36164		6.71208				11.0627		12.2029		372.854		46434.8				13.4091		7.81641				9.4277		6.94027
2 SD		0.583962		283.029		1655.87				888.787		0.426646				0.517852		2.212		11.6219		532.165				1.78011		0.386062				0.489777		0.303593
ARM-3 Reference Value b		18.6		21166.8		73037.5				38021.8		7.02				12.2		9.07		387.231		45939				12.3		7.05				8.88		6.48
a Limits of detection (LOD) for each element and for each analysis were calculated as described in Howell et al. (2013), Chemical Geology, 355, 134-143.
b Reference values as given in the GeoReM database ( http://georem.mpch-mainz.gwdg.de/ )
Table S3b: Major, minor and trace element data acquired by fs-LA-sector field-ICP-MS on silicate reference glasses, using only BCR2-G as the calibration reference materials (CRM).
Sample	Analysis #	Li (µg/g)	LOD Li (µg/g) a	Mg (µg/g)	LOD Mg (µg/g)	Al (µg/g)	LOD Al (µg/g)	P (µg/g)	LOD P (µg/g)	Ca (µg/g)	LOD Ca (µg/g)	Sc (µg/g)	LOD Sc (µg/g)	Ti (µg/g)	LOD Ti (µg/g)	V (µg/g)	LOD V (µg/g)	Cr (µg/g)	LOD Cr (µg/g)	Mn (µg/g)	LOD Mn (µg/g)	Fe (µg/g)	LOD Fe (µg/g)	Co (µg/g)	LOD Co (µg/g)	Ni (µg/g)	LOD Ni (µg/g)	Y (µg/g)	LOD Y (µg/g)	Zr (µg/g)	LOD Zr (µg/g)	Yb (µg/g)	LOD Yb (µg/g)	Lu (µg/g)	LOD Lu (µg/g)
BIR-1G	1	3.32042	0.513684	58350.1	5.29527	74586.4	5.52618	129.338	4.45768	89330.3	142.801	38.5409	0.210816	5694.66	4.97013	330.423	0.0882192	250.607	8.68025	1366.3	1.3495	81723.8	38.3964	53.3449	0.395657	140.924	3.98177	13.0745	0.0303141	12.4953	0.04605	1.60594	0.0414405	0.195121	0.00241502
BIR-1G	2	3.12503	0.433075	58505.8	7.56135	75060.1	6.82172	126.823	4.84016	86931.7	152.863	38.0595	0.261956	5589.27	6.41702	327.539	0.105323	244.91	7.91309	1372.89	1.23781	81229.5	34.4866	53.5798	0.400521	139.7	5.6093	13.3329	0.0363477	12.733	0.0233428	1.62084	0.00880033	0.247956	0.00862457
BIR-1G	3	3.12155	0.56573	57635.9	5.24113	74266.2	5.18925	127.386	5.49868	86906.3	155.357	37.9125	0.269304	5539.49	2.93028	324.307	0.10039	229.857	9.44629	1347.59	1.73818	80314	33.9833	52.9907	0.341348	137.782	5.65699	13.0776	0.0284506	12.5625	0.0202472	1.47237	0.00885449	0.214506	0.00237523
BIR-1G	4	3.21901	0.455613	58283.2	5.29944	74565.8	5.52507	123.06	6.77636	87595.8	130.48	38.5439	0.259245	5539.64	3.94109	326.322	0.0984921	233.574	9.82006	1355.04	1.7439	80817.6	42.2511	53.2988	0.335163	135.099	4.16412	12.7976	0.0265285	12.4634	0.0187967	1.53883	0.025001	0.232708	0.00662375
BIR-1G	5	3.15039	0.238353	59381.3	8.76757	80103.1	2.7734	122.231	2.43874	92429.2	60.2328	42.3502	0.0903915	5810.49	2.86382	327.044	0.0482068	325.444	3.97064	1386.44	0.512778	79613.6	11.3876	53.9531	0.143907	155.737	1.28225	14.847	0.0133525	13.9405	0.0094921	1.56935	0.054636	0.243408	0.00105509
BIR-1G	6	2.95612	0.193756	59338.7	8.06163	80059.5	7.6866	121.033	2.22493	91804.8	58.7404	42.0024	0.0768672	5784.71	2.32453	326.95	0.051184	325.033	2.95419	1370.51	0.652544	79801.5	14.673	53.4476	0.137625	156.34	1.37515	14.801	0.0166264	13.9568	0.00973753	1.67166	0.0305861	0.227507	0.00244886
BIR-1G	7	3.02756	0.223691	59295.3	6.33038	80604.7	6.05569	126.051	2.28234	92157.6	72.2799	42.4039	0.120686	5779.08	1.53785	328.948	0.136406	322.543	2.7866	1379.66	0.490718	79734.3	10.6409	53.5747	0.133345	156.473	1.57501	14.7914	0.0745863	14.01	0.0316334	1.64237	0.0532165	0.234768	0.0734155
BIR-1G	8	3.06944	0.337343	59977	8.64142	79400.2	3.00138	134.67	5.72104	90717.5	85.6771	40.7918	0.162982	5851.17	3.60953	321.629	0.0802782	382.474	3.53544	1349.36	0.70474	77436.5	22.2675	51.5761	0.275837	171.883	0.621971	14.7326	0.0143959	13.5519	0.0179313	1.65468	0.00653643	0.253887	0.00246008
BIR-1G	9	3.08539	0.321041	60383	8.02884	79738.9	2.41587	136.436	4.50108	91840.8	97.2021	41.508	0.15747	5935.32	3.20391	323.187	0.0660902	387.747	4.39779	1351.41	0.633772	77352.2	16.3276	52.1001	0.276303	172.345	0.740712	14.6096	0.0114761	13.7614	0.0273891	1.6896	0.019068	0.248466	0.00343946
BIR-1G	10	3.19999	0.250003	59510.1	8.16944	79632.6	3.4433	133.386	3.84346	91690.2	86.8694	41.5037	0.141164	5858.51	3.27941	323.351	0.0701412	368.468	2.64405	1359.71	0.575358	77796.5	21.8426	52.0926	0.30229	176.184	0.814287	14.2242	0.0106351	13.7031	0.0151081	1.53668	0.0216754	0.239991	0.00243787
BIR-1G	11	3.39484	0.29881	61068.1	9.77422	81165	4.11934	138.327	4.57986	93295.1	103.633	42.5569	0.168553	5960.86	3.91241	331.017	0.0836996	373.017	3.15215	1379.75	0.688295	80173.5	26.1518	53.3323	0.36189	178.38	0.97686	14.523	0.0126883	14.0447	0.018025	1.6195	0.0258745	0.266434	0.00291193
mean		3.15179		59248		78107.5		128.977		90427.2		40.5612		5758.47		326.429		313.061		1365.33		79635.7		53.0264		156.441		14.0738		13.3839		1.60198		0.236796
2 SD		0.25369		2011.59		5622.11		11.9062		4674.96		3.79047		298.797		6.09154		125.273		27.1653		3001.19		1.51618		32.7884		1.64383		1.33783		0.132266		0.03912
BIR-1G Reference Value b		3		56685.9		82034.8		117.835		95054.5		43		6233.23		326		392		1471.48		80840.2		52		178		14.3		14		1.64		0.248
NIST612	1	38.4805	0.940722	51.2177	22.9511	9733.02	9.22319	88.7691	18.4045	82933.8	334.038	38.4611	0.556207	40.7325	10.7836	39.0803	0.22061	45.4921	11.9327	40.7076	2.09236	< LOD	72.224	34.2266	0.947761	41.5502	2.13227	41.759	0.0542135	40.437	0.0734989	41.0072	0.0230898	38.8214	0.00613705
NIST612	2	39.4154	1.02157	54.1772	17.2906	9683.83	8.79211	85.8319	17.3745	80248.1	234.885	37.4144	0.391884	40.8646	7.74484	39.5572	0.209732	39.3851	9.23241	38.3035	1.33474	< LOD	67.371	33.6937	0.890876	37.9814	2.05417	39.5537	0.0385051	39.2313	0.0512091	39.057	0.0491711	37.3066	0.00479496
NIST612	3	38.9837	0.912469	62.4586	25.3999	9422.19	7.54855	92.0889	17.5257	78088.3	349.31	36.3909	0.564134	47.9553	11.3999	39.4684	0.245384	41.5317	11.4135	37.9702	1.83561	< LOD	79.0157	33.1096	1.09613	40.435	2.68376	38.876	0.0424356	38.4764	0.108424	37.6916	0.0777202	36.8819	0.00588504
NIST612	4	40.9643	1.08589	< LOD	35.8685	9775.32	10.851	98.5945	17.6915	81000.6	299.138	38.7936	0.569048	43.721	10.6712	39.8143	0.248032	40.5495	11.0754	38.3556	2.77738	< LOD	68.1851	33.3984	1.12168	40.3304	3.04683	40.582	0.0597666	38.9736	0.108719	39.1823	0.0821434	37.912	0.0139927
NIST612	5	39.195	1.35809	25.7768	25.3226	9637.47	9.09295	92.3682	17.3791	81684.4	242.45	38.7915	0.584706	46.182	11.4116	40.0088	0.23833	45.4043	13.1035	38.6338	2.24217	< LOD	64.2502	33.942	0.967979	41.0379	2.28196	41.5217	0.0565902	39.5113	0.0719225	39.1331	0.0262029	38.6101	0.0061736
NIST612	6	40.483	1.18265	< LOD	33.3119	9519.15	7.40509	86.651	18.9069	80783.1	239.829	38.4159	0.605874	45.519	11.9299	39.7535	0.203805	46.0328	10.9623	38.8319	2.24163	< LOD	81.8903	33.9641	1.36526	44.4578	3.76071	40.6145	0.0573613	39.5076	0.0334145	38.6564	0.0898275	38.2152	0.00678356
mean		39.587		48.4076		9628.5		90.7173		80789.7		38.0446		44.1624		39.6138		43.0659		38.8004				33.7224		40.9654		40.4845		39.3562		39.1213		37.9579
2 SD		1.89128		31.639		268.543		9.4172		3228.96		1.91041		5.87471		0.647866		5.82346		1.95961				0.820835		4.20789		2.22355		1.3118		2.15867		1.50232
NIST612 Reference Value b		40.2		68		11167		46.6		85002		39.9		44		38.8		36.4		38.7		51		35.5		38.8		38.3		37.9		39.2		37
a Limits of detection (LOD) for each element and for each analysis were calculated as described in Howell et al. (2013), Chemical Geology, 355, 134-143.
b Reference values as given in the GeoReM database ( http://georem.mpch-mainz.gwdg.de/ )

## Sheet: Table S4
Table S4: Fe isotope data acquired by fs-LA-MC-ICP-MS on silicate reference glasses over the course of 1.5 years (Apr. 2021 to Nov. 2022)
bracketing standard used (CRM)	Sample	δ56Fe (‰, CRM)	2 σ a	δ57Fe (‰, CRM)	2 σ		δ56Fe (‰, IRMM-14)	2 σ	δ57Fe (‰, IRMM-14)	2 σ
BHVO-2G	BIR-1G	-0.0599974	0.0692696	-0.0688105	0.138837		0.0390026	0.0692696	0.0831895	0.138837
		-0.0921102	0.0706493	-0.180082	0.142213		0.00688983	0.0706493	-0.0280824	0.142213
		-0.14502	0.0751482	-0.237466	0.145338		-0.0460198	0.0751482	-0.0854661	0.145338
		-0.145884	0.073622	-0.186125	0.143746		-0.046884	0.073622	-0.0341254	0.143746
		-0.0757871	0.0703399	-0.16484	0.13059		0.0232129	0.0703399	-0.0128397	0.13059
		-0.040452	0.0676458	-0.0653544	0.1366		0.058548	0.0676458	0.0866456	0.1366
		-0.0968418	0.0699545	-0.0411229	0.141942		0.00215822	0.0699545	0.110877	0.141942
		-0.0829549	0.0737624	-0.148293	0.136251		0.0160451	0.0737624	0.00370699	0.136251
		-0.0209347	0.0625058	0.0342475	0.11507		0.0780653	0.0625058	0.186248	0.11507
		-0.0911499	0.073274	-0.0651854	0.122207		0.00785011	0.073274	0.0868146	0.122207
		-0.0169157	0.0811298	-0.101615	0.132415		0.0820843	0.0811298	0.0503848	0.132415
		-0.108578	0.0672148	-0.121488	0.121173		-0.00957752	0.0672148	0.0305122	0.121173
		-0.130007	0.0680776	-0.0759838	0.123217		-0.0310075	0.0680776	0.0760162	0.123217
		-0.136899	0.0639012	-0.151319	0.119482		-0.0378991	0.0639012	0.000681329	0.119482
		-0.0665199	0.0602784	-0.1518	0.109615		0.0324801	0.0602784	0.000199945	0.109615
		0.0121539	0.0622919	0.0616642	0.116587		0.111154	0.0622919	0.213664	0.116587
		-0.00322135	0.0700718	0.0721663	0.142797		0.0957786	0.0700718	0.224166	0.142797
		-0.0573552	0.0657316	-0.131853	0.13946		0.0416448	0.0657316	0.0201466	0.13946
		-0.0636474	0.0677622	-0.0315097	0.130016		0.0353526	0.0677622	0.12049	0.130016
		-0.0405523	0.0640569	-0.0881594	0.126837		0.0584477	0.0640569	0.0638406	0.126837
		0.03134	0.0630346	0.0827084	0.144079		0.13034	0.0630346	0.234708	0.144079
		-0.0616965	0.0636741	-0.0496534	0.124583		0.0373035	0.0636741	0.102347	0.124583
							0.031135		0.069733		mean
								0.0990758		0.175183	2 SD
							-0.04 − 0.06		-0.05 − 0.11		range reported in literature (Oeser et al., GGR, 38, 311-328, 2014; Xu et al., JAAS, 36, 747-757, 2021)
BCR-2G	BIR-1G	-0.149057	0.0818343	-0.170297	0.165569		-0.064057	0.0818343	-0.0432974	0.165569
		-0.0491968	0.0815485	-0.14206	0.15117		0.0358032	0.0815485	-0.0150598	0.15117
		-0.0680722	0.0773383	0.00516824	0.15592		0.0169278	0.0773383	0.132168	0.15592
		-0.0353502	0.0713632	-0.0720616	0.144279		0.0496498	0.0713632	0.0549384	0.144279
		-0.0140723	0.0628543	-0.0119223	0.10146		0.0709277	0.0628543	0.115078	0.10146
		-0.035329	0.0675927	-0.113532	0.108228		0.049671	0.0675927	0.0134684	0.108228
		-0.0681931	0.0671666	-0.175496	0.106502		0.0168069	0.0671666	-0.0484956	0.106502
							0.0251042		0.0298286		mean
								0.0875812		0.146369	2 SD
							-0.04 − 0.06		-0.05 − 0.11		range reported in literature (Oeser et al., GGR, 38, 311-328, 2014; Xu et al., JAAS, 36, 747-757, 2021)
BHVO-2G	BCR-2G	-0.0819196	0.0829869	-0.160094	0.16111		0.0170804	0.0829869	-0.00809414	0.16111
		-0.0671515	0.0848307	-0.0592842	0.166494		0.0318485	0.0848307	0.0927158	0.166494
		0.00637852	0.0858957	-0.107521	0.160435		0.105379	0.0858957	0.0444791	0.160435
		0.00118375	0.0815244	0.194251	0.154792		0.100184	0.0815244	0.346251	0.154792
		0.0759803	0.0830494	-0.0332312	0.150037		0.17498	0.0830494	0.118769	0.150037
		0.0113485	0.0858835	0.0233507	0.146847		0.110349	0.0858835	0.175351	0.146847
		0.0255374	0.0796221	0.0349326	0.148545		0.124537	0.0796221	0.186933	0.148545
		0.00733859	0.0755459	0.0468638	0.132824		0.106339	0.0755459	0.198864	0.132824
		-0.0210533	0.0819863	-0.00560537	0.150151		0.0779467	0.0819863	0.146395	0.150151
		0.0425827	0.0694055	0.133786	0.117536		0.141583	0.0694055	0.285786	0.117536
		-0.0662909	0.0631541	-0.0636776	0.116442		0.0327091	0.0631541	0.0883224	0.116442
		-0.0190378	0.0641823	-0.0437546	0.119679		0.0799622	0.0641823	0.108245	0.119679
		-0.093574	0.0706752	-0.0367721	0.12856		0.00542597	0.0706752	0.115228	0.12856
		0.0775288	0.0654745	0.127519	0.107248		0.176529	0.0654745	0.279519	0.107248
		0.0879618	0.0612725	0.10141	0.108016		0.186962	0.0612725	0.25341	0.108016
							0.0981209		0.162145		mean
								0.116344		0.195491	2 SD
							0.08 − 0.12		0.09 − 0.16		range reported in literature (Oeser et al., GGR, 38, 311-328, 2014; Xu et al., JAAS, 36, 747-757, 2021)
a internal 2s-precision as calculated using Eq. (3)

## Sheet: Table S5
Table S5: Mg isotope data acquired by fs-LA-MC-ICP-MS on silicate reference glasses over the course of 1.5 years (Apr. 2021 to Nov. 2022)
bracketing standard used (CRM)	Sample	δ25Mg (‰, CRM)	2 σ a	δ26Mg (‰, CRM)	2 σ		δ25Mg (‰, DSM-3)	2 σ	δ26Mg (‰, DSM-3)	2 σ
GOR132-G	KL2-G	-0.0519427	0.0684607	-0.165951	0.0645995		-0.140943	0.0684607	-0.339951	0.0645995
		-0.142312	0.0663832	-0.179126	0.0668901		-0.231312	0.0663832	-0.353126	0.0668901
		-0.145474	0.058128	-0.195788	0.0603443		-0.234474	0.058128	-0.369788	0.0603443
		0.00166454	0.073483	-0.0246794	0.0772268		-0.0873355	0.073483	-0.198679	0.0772268
		-0.0388848	0.0759462	-0.0788411	0.0715515		-0.127885	0.0759462	-0.252841	0.0715515
		-0.0100998	0.0696897	-0.00535534	0.0834332		-0.0990998	0.0696897	-0.179355	0.0834332
		-0.0270678	0.0656154	-0.0421872	0.0625872		-0.116068	0.0656154	-0.216187	0.0625872
		-0.0694072	0.0632099	-0.0229744	0.0657956		-0.158407	0.0632099	-0.196974	0.0657956
		-0.0834288	0.0680469	-0.106095	0.071174		-0.172429	0.0680469	-0.280095	0.071174
		-0.0719731	0.0658916	-0.0627355	0.068749		-0.160973	0.0658916	-0.236735	0.068749
		-0.0664485	0.0592616	-0.0771265	0.0735528		-0.155448	0.0592616	-0.251127	0.0735528
		-0.0322011	0.0581972	-0.052221	0.0673042		-0.121201	0.0581972	-0.226221	0.0673042
		-0.0182964	0.0579687	-0.0530781	0.0607053		-0.107296	0.0579687	-0.227078	0.0607053
		-0.0023794	0.0580914	0.0365108	0.0597743		-0.0913794	0.0580914	-0.137489	0.0597743
		-0.133161	0.0522571	-0.104331	0.0679249		-0.222161	0.0522571	-0.278331	0.0679249
		-0.0758076	0.0614677	-0.0977622	0.0619954		-0.164808	0.0614677	-0.271762	0.0619954
		-0.0640751	0.0601949	-0.112225	0.0663117		-0.153075	0.0601949	-0.286225	0.0663117
		-0.112929	0.0526719	-0.262738	0.054844		-0.201929	0.0526719	-0.436738	0.054844
		-0.14834	0.0546125	-0.234139	0.0555009		-0.23734	0.0546125	-0.408139	0.0555009
		-0.0467715	0.0580046	-0.181051	0.0610457		-0.135772	0.0580046	-0.355051	0.0610457
		-0.0980357	0.056708	-0.24545	0.0610932		-0.187036	0.056708	-0.41945	0.0610932
		-0.0271316	0.0527536	-0.0853572	0.0570545		-0.116132	0.0527536	-0.259357	0.0570545
		-0.0568451	0.0598006	-0.121381	0.0656556		-0.145845	0.0598006	-0.295381	0.0656556
		-0.0856434	0.0559096	-0.100522	0.0589078		-0.174643	0.0559096	-0.274522	0.0589078
		-0.0772203	0.0672822	-0.0253501	0.0710793		-0.16622	0.0672822	-0.19935	0.0710793
		-0.00869913	0.0709153	-0.0646169	0.0693888		-0.0976991	0.0709153	-0.238617	0.0693888
		-0.0256467	0.0676204	-0.093517	0.0694237		-0.114647	0.0676204	-0.267517	0.0694237
		-0.094502	0.0677328	-0.149373	0.0683487		-0.183502	0.0677328	-0.323373	0.0683487
		-0.111738	0.0673845	-0.102134	0.0719614		-0.200738	0.0673845	-0.276134	0.0719614
		-0.116693	0.0620979	-0.209249	0.0562155		-0.205693	0.0620979	-0.383249	0.0562155
		-0.126023	0.0643155	-0.144258	0.0624375		-0.215023	0.0643155	-0.318258	0.0624375
		-0.132063	0.0613704	-0.185915	0.0567007		-0.221063	0.0613704	-0.359915	0.0567007
		-0.128102	0.0649672	-0.223591	0.067625		-0.217102	0.0649672	-0.397591	0.067625
		-0.137552	0.0565472	-0.212903	0.0579657		-0.226552	0.0565472	-0.386903	0.0579657
		-0.0325053	0.0539964	-0.0660781	0.0551836		-0.121505	0.0539964	-0.240078	0.0551836
		0.02587	0.0637913	0.0214226	0.0725021		-0.06313	0.0637913	-0.152577	0.0725021
							-0.160441		-0.285949		mean
								0.0974116		0.155514	2 SD
							-0.14 − -0.17		-0.26 − -0.33		range reported in literature (Oeser et al., GGR, 38, 311-328, 2014; Lin et al., JAAS, 37, 592-602, 2022)
GOR132-G	GOR128-G	0.0277786	0.0478437	0.0603353	0.052587		-0.0612214	0.0478437	-0.113665	0.052587
		0.00189199	0.0467325	0.0191287	0.0542319		-0.087108	0.0467325	-0.154871	0.0542319
		0.0181978	0.0476197	0.0334886	0.0501073		-0.0708022	0.0476197	-0.140511	0.0501073
		0.0220377	0.0525241	-0.00681354	0.0549117		-0.0669623	0.0525241	-0.180814	0.0549117
		-0.022648	0.0468789	-0.0216474	0.0513189		-0.111648	0.0468789	-0.195647	0.0513189
		0.00269663	0.0490164	0.0543007	0.0502866		-0.0863034	0.0490164	-0.119699	0.0502866
		-0.0132001	0.041114	-0.0359891	0.0401882		-0.1022	0.041114	-0.209989	0.0401882
		-0.0394477	0.0391769	-0.073349	0.0400322		-0.128448	0.0391769	-0.247349	0.0400322
		-0.0151702	0.0543102	-0.0267556	0.062109		-0.10417	0.0543102	-0.200756	0.062109
		-0.0542721	0.0574842	-0.0709083	0.0663611		-0.143272	0.0574842	-0.244908	0.0663611
		-0.0500862	0.0578731	-0.157361	0.0693435		-0.139086	0.0578731	-0.331361	0.0693435
		-0.00120676	0.0584712	-0.0416894	0.0699611		-0.0902068	0.0584712	-0.215689	0.0699611
		-0.0374294	0.0660013	-0.0578283	0.0645693		-0.126429	0.0660013	-0.231828	0.0645693
		-0.110558	0.0662293	-0.164345	0.0746875		-0.199558	0.0662293	-0.338345	0.0746875
		-0.0207668	0.0592122	-0.0532005	0.0696233		-0.109767	0.0592122	-0.2272	0.0696233
		-0.0706381	0.0591682	-0.168772	0.0699468		-0.159638	0.0591682	-0.342772	0.0699468
		-0.114545	0.0586179	-0.200807	0.0655414		-0.203545	0.0586179	-0.374807	0.0655414
		-0.101962	0.0385508	-0.240428	0.044735		-0.190962	0.0385508	-0.414428	0.044735
		-0.0298024	0.0431546	-0.127064	0.0421967		-0.118802	0.0431546	-0.301064	0.0421967
		-0.0606913	0.0536109	-0.142332	0.0570346		-0.149691	0.0536109	-0.316332	0.0570346
							-0.122491		-0.245102		mean
								0.0848885		0.173267	2 SD
							-0.12 − -0.17		-0.23 − -0.34		range reported in literature (Oeser et al., GGR, 38, 311-328, 2014; Lin et al., JAAS, 37, 592-602, 2022)
a internal 2s-precision as calculated using Eq. (3)

## Sheet: Table S6
Table S6: Mg isotope data acquired by fs-LA-MC-ICP-MS on the large "reference" San Carlos olivine crystal
position	d25Mg (‰, GOR132-G)	d26Mg (‰, GOR132-G)	d25Mg (‰, DSM-3)	d26Mg (‰, DSM-3)
core #1	-0.0111987	-0.0083984	-0.100199	-0.182398
core #2	0.0345318	-0.0362518	-0.0544682	-0.210252
core #3	-0.089994	-0.124425	-0.178994	-0.298425
core #4	-0.0736069	-0.162165	-0.162607	-0.336165
core #5	-0.076968	-0.150535	-0.165968	-0.324535
core #6	-0.0458506	-0.118299	-0.134851	-0.292299
core #7	-0.0866434	-0.198778	-0.175643	-0.372778
rim #1	-0.147962	-0.315914	-0.236962	-0.489914
rim #2	-0.0498861	-0.190892	-0.138886	-0.364892
rim #3	-0.155976	-0.346144	-0.244976	-0.520144
rim #4	-0.0895162	-0.250911	-0.178516	-0.424911
rim #5	-0.0128205	-0.0115273	-0.10182	-0.185527
rim #6	0.0185549	-0.0374528	-0.0704451	-0.211453
rim #7	-0.0292159	-0.0912155	-0.118216	-0.265216
rim #8	-0.104352	-0.235852	-0.193352	-0.409852
rim #9	-0.0819369	-0.157897	-0.170937	-0.331897
rim #10	-0.00168366	-0.0517107	-0.0906837	-0.225711
rim #11	-0.0431796	-0.0496665	-0.13218	-0.223667
			-0.147206	-0.315002	overall mean
			0.105095	0.203517	2 SD
			-0.138961	-0.288122	core mean
			0.0927189	0.137029	2 SD
			-0.152452	-0.332107	rim mean
			0.115356	0.236296	2 SD

## Sheet: Table S7
Table S7: Fe isotope data acquired by fs-LA-MC-ICP-MS on the large "reference" San Carlos olivine crystal
position	d56Fe (‰, BHVO-2G)	d57Fe (‰, BHVO-2G)	d56Fe (‰, IRMM-14)	d57Fe (‰, IRMM-14)
core #1	-0.168716	-0.273236	-0.0697159	-0.121236
core #2	-0.130438	-0.196083	-0.0314381	-0.0440831
core #3	-0.140426	-0.235838	-0.0414264	-0.0838384
core #4	-0.133374	-0.250892	-0.0343743	-0.0988922
core #5	-0.155942	-0.335183	-0.0569419	-0.183183
core #6	-0.152806	-0.238533	-0.0538064	-0.0865327
core #7	-0.223842	-0.353269	-0.124842	-0.201269
core #8	-0.262316	-0.389419	-0.163316	-0.237419
rim #1	-0.254822	-0.300682	-0.155822	-0.148682
rim #2	-0.306747	-0.466189	-0.207747	-0.314189
rim #3	-0.321727	-0.435869	-0.222727	-0.283869
rim #4	-0.303686	-0.453412	-0.204686	-0.301412
rim #5	-0.191068	-0.222746	-0.0920675	-0.0707462
rim #6	-0.234102	-0.339726	-0.135102	-0.187726
rim #7	-0.349017	-0.515322	-0.250017	-0.363322
rim #8	-0.281248	-0.476761	-0.182248	-0.324761
			-0.126642	-0.190697	overall mean
			0.147805	0.206231	2 SD
			-0.0719826	-0.132057	core mean
			0.0946861	0.134927	2 SD
			-0.181302	-0.249338	rim mean
			0.102626	0.203699	2 SD

## Sheet: Table S8
Table S8: EPMA data for tempered SC-OL crystal cuboids
Point	Comment	SiO2 (wt.%)	FeO (wt.%)	MgO (wt.%)	NiO (wt.%)	CaO (wt.%)	Sum (wt.%)	Mg#	distance (µm)	diffusion direction
1	SC3-21-3 line20	36.2732	12.0077	45.6076	0.2515	0.0456042	94.1855	0.871255	0.5	//a
2	SC3-21-3 line20	40.1733	11.1189	48.0791	0.369598	0.057676	99.7986	0.885113	1.5
3	SC3-21-3 line20	40.64	9.44022	49.098	0.361946	0.0783916	99.6186	0.902596	2.5
4	SC3-21-3 line20	40.4533	8.77862	49.9252	0.343018	0.0801055	99.5803	0.910175	3.5
5	SC3-21-3 line20	41.0031	8.41325	50.3792	0.372216	0.0890475	100.257	0.914303	4.5
6	SC3-21-3 line20	40.7541	8.33426	50.47	0.411884	0.0734735	100.044	0.915179	5.5
7	SC3-21-3 line20	40.7023	8.08739	50.2178	0.353187	0.0886004	99.4492	0.917104	6.5
8	SC3-21-3 line20	40.9616	8.30463	50.3085	0.38027	0.0988837	100.054	0.915207	7.5
9	SC3-21-3 line20	41.0238	8.10714	50.3489	0.425879	0.0888239	99.9946	0.917117	8.5
10	SC3-21-3 line20	40.7956	8.29476	50.1471	0.339293	0.0831607	99.66	0.915049	9.5
11	SC3-21-3 line20	41.0031	8.18614	50.4296	0.358322	0.0708654	100.048	0.916499	10.5
12	SC3-21-3 line20	40.7749	8.24538	50.2077	0.43494	0.0822665	99.7451	0.915606	11.5
13	SC3-21-3 line20	41.0238	8.21576	50.3792	0.388526	0.100225	100.108	0.916146	12.5
14	SC3-21-3 line20	41.1379	8.29476	50.3892	0.418428	0.0771993	100.318	0.915423	13.5
15	SC3-21-3 line20	41.0031	8.23551	50.3287	0.362752	0.0772739	100.007	0.915884	14.5
16	SC3-21-3 line20	40.8475	8.25526	50.359	0.396782	0.0836823	99.9422	0.915746	15.5
17	SC3-21-3 line20	41.1172	8.13676	50.3792	0.45719	0.084502	100.175	0.916885	16.5
18	SC3-21-3 line20	40.8786	8.14664	50.1572	0.381378	0.0684064	99.6323	0.916455	17.5
19	SC3-21-3 line20	40.7023	8.33426	50.2178	0.367685	0.0883768	99.7104	0.914789	18.5
20	SC3-21-3 line20	40.9408	8.28488	50.2278	0.445813	0.103355	100.003	0.915267	19.5
21	SC3-21-3 line20	40.8164	8.23551	50.2581	0.386814	0.0774974	99.7743	0.915776	20.5
22	SC3-21-3 line20	41.2831	8.29476	50.4094	0.448632	0.0785406	100.515	0.915454	21.5
23	SC3-21-3 line20	40.8786	8.29476	50.4195	0.313016	0.0879297	99.9938	0.91547	22.5
24	SC3-21-3 line20	41.1379	8.19601	50.1169	0.399198	0.0675867	99.9176	0.915929	23.5
25	SC3-21-3 line20	41.0342	8.22564	50.2278	0.459808	0.0842039	100.032	0.915822	24.5
26	SC3-21-3 line20	41.0549	8.35401	50.3993	0.422757	0.0793603	100.31	0.914886	25.5
27	SC3-21-3 line20	40.8268	8.4725	50.2581	0.411381	0.0929224	100.062	0.913561	26.5
28	SC3-21-3 line20	41.0342	8.46263	50.2077	0.341408	0.0833097	100.129	0.913574	27.5
1	SC3-21-3 line21	38.7004	10.6746	52.9112	0.341508	0.0804036	102.708	0.898286	0.5	//a
2	SC3-21-3 line21	40.5778	9.50935	49.9252	0.381277	0.073399	100.467	0.90342	1.5
3	SC3-21-3 line21	40.4741	8.591	49.6831	0.418529	0.0785406	99.2452	0.911535	2.5
4	SC3-21-3 line21	40.7956	8.27501	50.2278	0.429704	0.0748893	99.8031	0.915359	3.5
5	SC3-21-3 line21	40.5052	8.11701	50.6011	0.373827	0.0981385	99.6953	0.917404	4.5
6	SC3-21-3 line21	40.9408	8.05777	50.248	0.398594	0.0829371	99.7282	0.917428	5.5
7	SC3-21-3 line21	40.7541	8.18614	50.6414	0.399601	0.0748893	100.056	0.91682	6.5
8	SC3-21-3 line21	40.6608	8.17626	50.4397	0.491522	0.0855452	99.8538	0.916607	7.5
9	SC3-21-3 line21	40.9305	8.07751	50.5607	0.461419	0.0842784	100.114	0.917712	8.5
10	SC3-21-3 line21	40.9201	8.00839	50.3993	0.365672	0.0864394	99.7799	0.918119	9.5
11	SC3-21-3 line21	40.6504	7.86027	50.1169	0.394164	0.0765287	99.0983	0.919094	10.5
12	SC3-21-3 line21	40.8475	8.15651	50.248	0.364262	0.0786897	99.695	0.916501	11.5
13	SC3-21-3 line21	40.7438	8.35401	50.5002	0.389936	0.0937421	100.082	0.915042	12.5
14	SC3-21-3 line21	40.9305	8.34413	50.4901	0.466855	0.0789132	100.311	0.915118	13.5
15	SC3-21-3 line21	40.8682	8.02814	50.2278	0.382082	0.0967972	99.6031	0.917676	14.5
16	SC3-21-3 line21	40.7956	8.13676	50.248	0.361544	0.0863649	99.6283	0.916686	15.5
17	SC3-21-3 line21	40.8268	8.44288	50.6818	0.339293	0.0849491	100.376	0.914496	16.5
18	SC3-21-3 line21	40.9305	8.42313	50.3388	0.389936	0.0751129	100.157	0.914148	17.5
19	SC3-21-3 line21	41.2209	8.31451	50.5305	0.413495	0.0743677	100.554	0.915456	18.5
20	SC3-21-3 line21	40.8682	8.39351	50.2985	0.368289	0.0927733	100.021	0.914361	19.5
21	SC3-21-3 line21	40.7334	8.36388	50.2581	0.508537	0.0716106	99.9355	0.914575	20.5
22	SC3-21-3 line21	40.6504	8.21576	50.2278	0.405038	0.0740696	99.5731	0.915914	21.5
23	SC3-21-3 line21	41.2417	8.16639	50.3388	0.351979	0.0834587	100.182	0.916546	22.5
24	SC3-21-3 line21	40.7749	8.22564	50.2985	0.342314	0.0631902	99.7045	0.91593	23.5
25	SC3-21-3 line21	40.9201	8.04789	50.3388	0.441786	0.0681828	99.8168	0.917657	24.5
26	SC3-21-3 line21	40.8994	8.40338	50.4094	0.485582	0.0809997	100.279	0.914442	25.5
27	SC3-21-3 line21	41.0653	8.19601	50.3287	0.382888	0.0990327	100.072	0.916253	26.5
28	SC3-21-3 line21	40.7645	8.20589	50.3489	0.403427	0.0753364	99.7981	0.916192	27.5
29	SC3-21-3 line21	40.7334	8.05777	50.359	0.328218	0.0918791	99.5702	0.917595	28.5
30	SC3-21-3 line21	40.7853	8.20589	50.2682	0.392251	0.0830116	99.7346	0.916069	29.5
31	SC3-21-3 line21	40.9408	8.18614	50.0866	0.382888	0.0871101	99.6836	0.915976	30.5
32	SC3-21-3 line21	40.5986	8.18614	50.2985	0.444102	0.0792858	99.6065	0.9163	31.5
33	SC3-21-3 line21	41.1068	8.21576	50.2985	0.435846	0.0896436	100.147	0.916022	32.5
34	SC3-21-3 line21	40.9408	8.32438	50.1774	0.401917	0.0763797	99.9209	0.914819	33.5
35	SC3-21-3 line21	41.252	8.4725	50.4498	0.437557	0.0848746	100.697	0.913862	34.5
36	SC3-21-3 line21	40.6297	8.31451	50.4599	0.422455	0.0961266	99.9226	0.915347	35.5
37	SC3-21-3 line21	40.8475	8.29476	50.5204	0.302243	0.0833097	100.048	0.915624	36.5
38	SC3-21-3 line21	41.1483	8.5515	50.4195	0.433329	0.0904633	100.643	0.913081	37.5
1	SC3-21-4 line1	39.5198	14.0023	44.276	0.241331	0.011103	98.0505	0.849257	0.5	//b
2	SC3-21-4 line1	39.7687	13.7653	46.3642	0.218275	0.0563347	100.173	0.857165	1.5
3	SC3-21-4 line1	39.6858	12.9655	46.6264	0.225222	0.0431452	99.5461	0.864999	2.5
4	SC3-21-4 line1	40.3289	12.4915	47.1611	0.26922	0.0589427	100.31	0.870579	3.5
5	SC3-21-4 line1	40.194	11.741	47.4436	0.378257	0.0672886	99.8242	0.878042	4.5
6	SC3-21-4 line1	40.2666	11.2275	48.1901	0.362349	0.0827881	100.129	0.884357	5.5
7	SC3-21-4 line1	40.6297	10.8819	48.2708	0.346744	0.0783916	100.208	0.887683	6.5
8	SC3-21-4 line1	40.5882	10.7437	48.755	0.339293	0.0948598	100.521	0.889933	7.5
9	SC3-21-4 line1	40.6089	10.2598	49.0274	0.41128	0.0772739	100.385	0.894892	8.5
10	SC3-21-4 line1	40.4533	9.68709	49.1383	0.386311	0.0794348	99.7445	0.900377	9.5
11	SC3-21-4 line1	40.5986	9.57847	49.6528	0.332648	0.0649786	100.227	0.902305	10.5
12	SC3-21-4 line1	40.7541	9.02549	49.7436	0.440981	0.0915066	100.056	0.907577	11.5
13	SC3-21-4 line1	40.6608	9.11436	49.8546	0.369799	0.0719832	100.072	0.90694	12.5
14	SC3-21-4 line1	40.9408	9.03536	49.905	0.394768	0.0687044	100.345	0.907757	13.5
15	SC3-21-4 line1	40.6815	8.77862	50.1875	0.393459	0.0695986	100.111	0.910603	14.5
16	SC3-21-4 line1	40.8579	8.80824	50.3287	0.407253	0.0806271	100.483	0.910557	15.5
17	SC3-21-4 line1	40.7127	8.512	50.4195	0.390338	0.0808507	100.115	0.913447	16.5
18	SC3-21-4 line1	40.8994	8.66012	50.1774	0.373424	0.0888985	100.199	0.911687	17.5
19	SC3-21-4 line1	41.0653	8.40338	50.137	0.331843	0.082192	100.02	0.914017	18.5
20	SC3-21-4 line1	40.9512	8.37376	50.2077	0.288752	0.1041	99.9255	0.914404	19.5
21	SC3-21-4 line1	41.0031	8.56138	50.359	0.398393	0.0780935	100.4	0.912893	20.5
22	SC3-21-4 line1	41.1172	8.46263	50.4296	0.469171	0.0878552	100.566	0.913922	21.5
23	SC3-21-4 line1	40.7541	8.23551	50.47	0.404031	0.0808507	99.9445	0.916099	22.5
24	SC3-21-4 line1	40.9201	8.433	50.48	0.429302	0.073548	100.336	0.914276	23.5
25	SC3-21-4 line1	40.806	8.28488	50.2682	0.345737	0.0813723	99.7862	0.915329	24.5
26	SC3-21-4 line1	41.0446	8.26513	50.127	0.416515	0.0786897	99.9319	0.915296	25.5
27	SC3-21-4 line1	41.0342	8.591	50.3892	0.42316	0.0804781	100.518	0.912666	26.5
28	SC3-21-4 line1	40.5778	8.46263	50.4296	0.422053	0.0827136	99.9748	0.913922	27.5
29	SC3-21-4 line1	40.9305	8.40338	50.5708	0.38017	0.055664	100.341	0.914691	28.5
30	SC3-21-4 line1	40.7749	8.37376	50.6213	0.441182	0.093444	100.305	0.915044	29.5
31	SC3-21-4 line1	40.9616	8.37376	50.0664	0.359127	0.0783171	99.8392	0.914183	30.5
32	SC3-21-4 line1	40.7334	8.5515	50.4599	0.482763	0.0842784	100.312	0.913144	31.5
33	SC3-21-4 line1	40.6297	8.28488	50.3489	0.413193	0.0836823	99.7603	0.915453	32.5
34	SC3-21-4 line1	40.5363	8.53175	50.4498	0.390942	0.0815213	99.9903	0.913311	33.5
35	SC3-21-4 line1	40.7438	8.34413	50.5204	0.352482	0.0772739	100.038	0.915164	34.5
36	SC3-21-4 line1	40.9305	8.30463	50.3892	0.385808	0.0902398	100.1	0.915331	35.5
37	SC3-21-4 line1	40.9927	8.54163	50.3489	0.42316	0.0796584	100.386	0.913061	36.5
38	SC3-21-4 line1	41.0031	8.35401	50.5607	0.381378	0.0831607	100.382	0.915135	37.5
39	SC3-21-4 line1	40.9616	8.40338	50.1673	0.387117	0.0756345	99.995	0.914064	38.5
40	SC3-21-4 line1	40.7438	8.37376	50.4094	0.462828	0.0790623	100.069	0.914717	39.5
41	SC3-21-4 line1	40.9927	8.27501	50.3892	0.360537	0.0763797	100.094	0.915607	40.5
42	SC3-21-4 line1	40.9305	8.49225	50.3186	0.450545	0.0715361	100.263	0.913473	41.5
43	SC3-21-4 line1	40.8786	8.35401	50.5708	0.32701	0.0903888	100.221	0.91515	42.5
44	SC3-21-4 line1	40.7541	8.40338	50.4599	0.433631	0.0952324	100.146	0.91452	43.5
45	SC3-21-4 line1	40.8268	8.37376	50.5607	0.532398	0.0677357	100.361	0.914951	44.5
1	SC3-21-4 line30	40.3185	13.6271	47.7361	0.183541	0.0266025	101.892	0.861904	0.5	//c
2	SC3-21-4 line30	40.2459	12.4915	46.9089	0.26187	0.0260809	99.9343	0.869974	2.5
3	SC3-21-4 line30	40.6089	12.4718	47.3528	0.247976	0.0515656	100.733	0.871213	4.5
4	SC3-21-4 line30	40.5156	11.9484	47.4738	0.216463	0.066767	100.221	0.876224	6.5
5	SC3-21-4 line30	40.7334	11.2769	47.9782	0.249486	0.0577505	100.296	0.883455	8.5
6	SC3-21-4 line30	40.9616	11.0004	48.3616	0.271435	0.0695241	100.665	0.886788	10.5
7	SC3-21-4 line30	40.7438	10.2993	49.0778	0.334763	0.080031	100.536	0.894627	12.5
8	SC3-21-4 line30	41.0031	9.80559	49.1585	0.314325	0.0750384	100.357	0.899318	14.5
9	SC3-21-4 line30	41.1898	9.25261	49.3502	0.38178	0.0796584	100.254	0.904789	16.5
10	SC3-21-4 line30	40.9823	9.06499	49.9857	0.369598	0.0897927	100.492	0.907618	18.5
11	SC3-21-4 line30	41.169	8.99586	50.2581	0.303652	0.0871846	100.814	0.908709	20.5
12	SC3-21-4 line30	41.1172	8.67	50.1774	0.338085	0.0760071	100.379	0.911595	22.5
13	SC3-21-4 line30	41.3972	8.71937	50.0059	0.379263	0.075709	100.577	0.910859	24.5
14	SC3-21-4 line30	41.3039	8.5515	50.5103	0.40242	0.0727283	100.841	0.913223	26.5
15	SC3-21-4 line30	41.4595	8.57125	50.5103	0.44088	0.0730264	101.055	0.91304	28.5
16	SC3-21-4 line30	41.1379	8.42313	50.5406	0.359933	0.071387	100.533	0.914461	30.5
17	SC3-21-4 line30	41.3972	8.50213	50.6515	0.394265	0.082341	101.028	0.913901	32.5
18	SC3-21-4 line30	41.3972	8.35401	50.5708	0.403829	0.0733245	100.799	0.91515	34.5
19	SC3-21-4 line30	41.5736	8.30463	50.5507	0.410474	0.0874081	100.927	0.915578	36.5
20	SC3-21-4 line30	41.5632	8.21576	50.4195	0.414602	0.0671396	100.68	0.916207	38.5
21	SC3-21-4 line30	41.8433	8.34413	50.3691	0.296605	0.0839804	100.937	0.914931	40.5
22	SC3-21-4 line30	41.5113	8.41325	50.5406	0.415911	0.0652021	100.946	0.914553	42.5
23	SC3-21-4 line30	41.1172	8.25526	50.6717	0.405038	0.0767522	100.526	0.916222	44.5
24	SC3-21-4 line30	41.2831	8.591	50.6011	0.32691	0.0772739	100.879	0.913	46.5
25	SC3-21-4 line30	41.4906	8.39351	50.3792	0.370605	0.0751129	100.709	0.914487	48.5
26	SC3-21-4 line30	41.4387	8.26513	50.7928	0.41873	0.0922517	101.008	0.916313	50.5
27	SC3-21-4 line30	41.4387	8.46263	50.48	0.446115	0.0697477	100.897	0.914	52.5
28	SC3-21-4 line30	41.5425	8.433	50.3489	0.403527	0.0759326	100.804	0.914072	54.5
29	SC3-21-4 line30	41.7292	8.46263	50.5607	0.330836	0.0791368	101.163	0.914126	56.5
30	SC3-21-4 line30	41.3869	8.34413	50.5809	0.435443	0.0634137	100.811	0.915257	58.5
31	SC3-21-4 line30	41.4699	8.30463	50.3388	0.348556	0.0817449	100.544	0.915253	60.5
32	SC3-21-4 line30	41.3558	8.433	50.6011	0.393661	0.07556	100.859	0.914463	62.5
33	SC3-21-4 line30	41.335	8.36388	50.5607	0.38027	0.0831607	100.723	0.915043	64.5
34	SC3-21-4 line30	41.5113	8.512	50.6818	0.43504	0.0721322	101.212	0.913857	66.5
35	SC3-21-4 line30	41.3454	8.37376	50.3993	0.406044	0.0652021	100.59	0.914702	68.5
36	SC3-21-4 line30	41.2831	8.19601	50.2077	0.369296	0.0681828	100.124	0.916069	70.5
37	SC3-21-4 line30	41.4491	8.61075	50.7221	0.413193	0.0804036	101.276	0.913007	72.5
38	SC3-21-4 line30	41.3869	8.32438	50.5708	0.429704	0.0761561	100.788	0.915426	74.5
39	SC3-21-4 line30	41.4284	8.37376	50.4195	0.374834	0.0884514	100.685	0.914733	76.5
40	SC3-21-4 line30	41.5632	8.56138	50.2178	0.362047	0.0718341	100.776	0.91267	78.5
41	SC3-21-4 line30	41.5425	8.24538	50.4599	0.451351	0.0908359	100.79	0.915992	80.5
42	SC3-21-4 line30	41.3454	8.54163	50.48	0.399098	0.0851726	100.851	0.913267	82.5
43	SC3-21-4 line30	41.3972	8.25526	50.6112	0.447323	0.0804036	100.791	0.91613	84.5
44	SC3-21-4 line30	41.4076	8.50213	50.6112	0.31513	0.0898672	100.926	0.913838	86.5
1	SC3-21-4 line32	39.9554	13.4395	46.5558	0.188675	0.0283909	100.168	0.860569	0.5	//c
2	SC3-21-4 line32	40.2977	12.8371	46.4146	0.260058	0.0549934	99.8645	0.865628	2.5
3	SC3-21-4 line32	39.8725	12.4718	46.9997	0.217571	0.0655747	99.6271	0.870371	4.5
4	SC3-21-4 line32	40.194	12.2743	47.3023	0.228545	0.0600605	100.059	0.872875	6.5
5	SC3-21-4 line32	40.3081	11.6818	47.6252	0.279489	0.0638608	99.9584	0.87899	8.5
6	SC3-21-4 line32	40.4015	11.2374	48.0589	0.286335	0.0606566	100.045	0.883988	10.5
7	SC3-21-4 line32	40.6712	10.4869	48.3414	0.280999	0.0745913	99.8551	0.891459	12.5
8	SC3-21-4 line32	40.5986	10.0722	48.8761	0.331843	0.0856197	99.9643	0.896328	14.5
9	SC3-21-4 line32	40.6297	9.94384	49.0476	0.348556	0.0774229	100.047	0.897836	16.5
10	SC3-21-4 line32	40.6297	9.50935	49.2796	0.388526	0.0857688	99.8929	0.902279	18.5
11	SC3-21-4 line32	40.7956	9.3711	49.5015	0.370706	0.075858	100.115	0.903953	20.5
12	SC3-21-4 line32	40.8579	8.98599	49.6932	0.366779	0.069226	99.973	0.907859	22.5
13	SC3-21-4 line32	40.723	8.90699	49.8849	0.437859	0.0967227	100.049	0.908914	24.5
14	SC3-21-4 line32	40.4741	8.62062	49.9252	0.373525	0.0850236	99.4785	0.911649	26.5
15	SC3-21-4 line32	40.5052	8.77862	50.1572	0.27073	0.100821	99.8126	0.910554	28.5
16	SC3-21-4 line32	40.5571	8.50213	50.0664	0.350167	0.089271	99.5651	0.912982	30.5
17	SC3-21-4 line32	40.8475	8.53175	50.2077	0.372216	0.0853217	100.044	0.91293	32.5
18	SC3-21-4 line32	40.8164	8.591	50.0664	0.347549	0.0850236	99.9064	0.912153	34.5
19	SC3-21-4 line32	40.7127	8.54163	50.3085	0.376344	0.0777955	100.017	0.912997	36.5
20	SC3-21-4 line32	40.6815	8.4725	50.0765	0.388425	0.0745167	99.6935	0.913275	38.5
21	SC3-21-4 line32	40.8786	8.17626	50.2278	0.380371	0.0833842	99.7465	0.916285	40.5
22	SC3-21-4 line32	40.8475	8.32438	50.3287	0.471084	0.0885259	100.06	0.915053	42.5
23	SC3-21-4 line32	41.1068	8.38363	50.248	0.387419	0.0883023	100.214	0.914375	44.5
24	SC3-21-4 line32	40.7334	8.42313	50.5204	0.437859	0.0739951	100.189	0.91443	46.5
25	SC3-21-4 line32	40.9097	8.512	50.4195	0.464137	0.0858433	100.391	0.913447	48.5
26	SC3-21-4 line32	40.8164	8.40338	50.2985	0.427187	0.0836823	100.029	0.914269	50.5
27	SC3-21-4 line32	40.5778	8.433	50.47	0.431215	0.0657983	99.9778	0.91426	52.5
28	SC3-21-4 line32	40.8682	8.19601	50.2682	0.377753	0.086663	99.7969	0.916161	54.5
29	SC3-21-4 line32	40.1733	8.5515	50.5708	0.45417	0.0881533	99.8379	0.913318	56.5
30	SC3-21-4 line32	40.9823	8.20589	50.1976	0.441182	0.0979895	99.925	0.91596	58.5
31	SC3-21-4 line32	40.7438	8.32438	50.48	0.431617	0.0802545	100.06	0.915286	60.5
32	SC3-21-4 line32	41.0135	8.13676	50.3085	0.405541	0.0902398	99.9545	0.916778	62.5
33	SC3-21-4 line32	40.8786	8.45275	50.4397	0.390338	0.0850981	100.246	0.914029	64.5
34	SC3-21-4 line32	40.7645	8.36388	50.47	0.403024	0.0763051	100.078	0.914903	66.5
35	SC3-21-4 line32	40.7334	8.48238	50.4498	0.372417	0.0856197	100.124	0.91377	68.5
36	SC3-21-4 line32	40.6712	8.61075	50.5103	0.450646	0.0893456	100.332	0.912674	70.5
37	SC3-21-4 line32	40.6193	8.40338	50.2682	0.406548	0.0762306	99.7736	0.914222	72.5
38	SC3-21-4 line32	40.9512	8.41325	50.3691	0.410978	0.0813723	100.226	0.914287	74.5
39	SC3-21-4 line32	41.1794	8.36388	50.3287	0.341206	0.073399	100.287	0.914685	76.5
40	SC3-21-4 line32	41.2002	8.29476	50.591	0.396178	0.0883768	100.57	0.915732	78.5

## Sheet: Table S9
Table S9: LA-ICP-MS depth profile data for tempered SC-OL crystal cuboids
sample	layer	Mg (wt.%)	Fe (wt.%)	Mg#	depth (µm)	diffusion direction
SC3-21-3 dp20	1	29.3961	10.7664	0.862514	0.518863	//a
	2	29.9399	8.8444	0.88608	1.55659
	3	30.5426	7.65697	0.901624	2.59431
	4	30.8969	6.90404	0.911367	3.63204
	5	31.0355	6.59932	0.915294	4.66976
	6	30.9216	6.4677	0.916563	5.70749
	7	31.1945	6.43836	0.917577	6.74521
	8	30.8917	6.4371	0.916851	7.78294
	9	31.1929	6.3925	0.918112	8.82066
	10	31.2423	6.3838	0.918333	9.85839
	11	31.1938	6.40998	0.917908	10.8961
	12	31.0174	6.37636	0.917877	11.9338
	13	31.015	6.43223	0.917211	12.9716
	14	31.0949	6.44065	0.917307	14.0093
	15	31.015	6.38624	0.917755	15.047
	16	31.0208	6.38656	0.917765	16.0847
	17	30.9096	6.36514	0.917747	17.1225
	18	31.0973	6.39043	0.917905	18.1602
	19	30.9466	6.39653	0.917466	19.1979
	20	31.0191	6.36264	0.918044	20.2356
	21	31.0647	6.36744	0.918097	21.2734
	22	30.7001	6.31667	0.917811	22.3111
	23	31.1674	6.4368	0.917529	23.3488
	24	31.2161	6.36664	0.918472	24.3865
	25	30.8273	6.33479	0.917907	25.4243
SC3-21-3 dp21	1	29.9123	7.69152	0.899352	0.440112	//a
	2	30.2972	7.21757	0.906059	1.32034
	3	30.4967	6.88848	0.910493	2.20056
	4	30.4781	6.66315	0.913118	3.08079
	5	30.6461	6.49437	0.915558	3.96101
	6	30.8736	6.40777	0.917154	4.84124
	7	30.8909	6.42853	0.91695	5.72146
	8	30.9381	6.38659	0.917563	6.60169
	9	31.0345	6.37334	0.917954	7.48191
	10	31.276	6.44753	0.917666	8.36214
	11	31.2684	6.41467	0.918033	9.24236
	12	30.9531	6.34367	0.918108	10.1226
	13	30.8739	6.38343	0.917443	11.0028
	14	31.0106	6.44447	0.917056	11.883
	15	30.6736	6.32193	0.917683	12.7633
	16	31.0387	6.39434	0.917717	13.6435
	17	30.9071	6.36831	0.917704	14.5237
	18	31.1639	6.38528	0.918127	15.4039
	19	30.6626	6.29169	0.918018	16.2842
	20	30.9805	6.3398	0.91822	17.1644
	21	31.0358	6.35752	0.918145	18.0446
	22	31.0988	6.3699	0.918151	18.9248
	23	31.0019	6.37618	0.917842	19.8051
	24	30.8946	6.35618	0.917817	20.6853
	25	30.9818	6.39016	0.917628	21.5655
SC3-21-4 dp01	1	28.6417	12.0218	0.845541	0.611568	//b
	2	28.9206	11.3185	0.85446	1.8347
	3	29.165	10.6421	0.862955	3.05784
	4	29.5128	10.0411	0.871023	4.28097
	5	29.9105	9.49613	0.878598	5.50411
	6	30.1226	8.97592	0.885201	6.72724
	7	30.2516	8.61789	0.889693	7.95038
	8	30.6365	8.26318	0.894945	9.17351
	9	30.8279	7.89455	0.899722	10.3966
	10	30.6974	7.57327	0.903038	11.6198
	11	31.0117	7.38237	0.906121	12.8429
	12	30.9249	7.1473	0.908605	14.0661
	13	30.8132	7.01921	0.9098	15.2892
	14	30.726	6.92805	0.910636	16.5123
	15	31.2081	6.89924	0.912229	17.7355
	16	31.4159	6.83172	0.913539	18.9586
	17	31.1404	6.78068	0.913436	20.1817
	18	31.0187	6.7465	0.913526	21.4049
	19	31.3974	6.74933	0.914447	22.628
	20	31.4038	6.72206	0.914779	23.8511
	21	31.214	6.70144	0.914545	25.0743
	22	31.1547	6.67943	0.914654	26.2974
	23	30.9517	6.65371	0.914445	27.5205
	24	31.4827	6.71897	0.91501	28.7437
	25	31.3105	6.68847	0.914937	29.9668
SC3-21-4 dp30	1	29.2801	10.4327	0.865746	0.672992	//c
	2	29.4366	9.98661	0.871344	2.01898
	3	29.7299	9.72026	0.875429	3.36496
	4	29.807	9.50184	0.878164	4.71095
	5	29.7977	9.21769	0.881343	6.05693
	6	30.0333	9.01355	0.884472	7.40292
	7	30.3002	8.69813	0.888938	8.7489
	8	30.4836	8.46494	0.892175	10.0949
	9	30.3307	8.15709	0.895217	11.4409
	10	30.587	7.98069	0.898023	12.7869
	11	30.4532	7.70047	0.900859	14.1328
	12	30.8677	7.61983	0.902986	15.4788
	13	30.9661	7.42455	0.90551	16.8248
	14	30.9579	7.26645	0.907313	18.1708
	15	30.922	7.09006	0.909263	19.5168
	16	31.1721	7.02587	0.910668	20.8628
	17	31.2515	6.91772	0.912126	22.2088
	18	31.1853	6.77914	0.913568	23.5547
	19	31.3305	6.70886	0.91475	24.9007
	20	31.0572	6.62115	0.915092	26.2467
	21	31.227	6.62004	0.915528	27.5927
	22	31.3114	6.51439	0.916969	28.9387
	23	31.3205	6.5114	0.917026	30.2847
	24	31.3159	6.52534	0.916852	31.6306
	25	31.4815	6.52866	0.917215	32.9766
SC3-21-4 dp32	1	28.6015	11.1507	0.854936	0.85515	//c
	2	28.6893	10.6651	0.860739	2.56545
	3	28.9826	10.1825	0.867373	4.27575
	4	29.3341	9.85155	0.872475	5.98605
	5	29.5052	9.463	0.877512	7.69635
	6	29.4464	9.05416	0.881973	9.40665
	7	29.9571	8.75808	0.887123	11.117
	8	29.9192	8.25954	0.892739	12.8273
	9	30.1147	8.03553	0.895952	14.5376
	10	30.1865	7.72884	0.89974	16.2479
	11	30.2144	7.44473	0.903149	17.9582
	12	30.4456	7.27389	0.905813	19.6685
	13	30.37	7.08587	0.907816	21.3788
	14	30.5409	6.92862	0.910137	23.0891
	15	30.5501	6.7563	0.912199	24.7994
	16	30.8844	6.69892	0.913742	26.5097
	17	30.1897	6.56047	0.913595	28.22
	18	30.8834	6.61447	0.914734	29.9303
	19	30.9796	6.60208	0.915122	31.6406
	20	30.7469	6.55682	0.915071	33.3509
	21	30.7595	6.49068	0.915887	35.0612
	22	30.8333	6.51343	0.915802	36.7715
	23	30.6719	6.4461	0.916197	38.4818
	24	30.7721	6.45169	0.916381	40.1921
	25	30.5459	6.45513	0.915773	41.9024

## Sheet: Table S10
Table S10: Major, minor and trace element data acquired by fs-LA-sector field-ICP-MS depth profiling on tempered SC-OL crystal cuboid SC3-21-4 (diffusion direction //b)
sample	layer	Li (µg/g)	2SE Li (µg/g) a	LOD Li (µg/g) b	Mg (µg/g)	2SE Mg (µg/g)	LOD Mg (µg/g)	V (µg/g)	2SE V (µg/g)	LOD V (µg/g)	Cr (µg/g)	2SE Cr (µg/g)	LOD Cr (µg/g)	Mn (µg/g)	2SE Mn (µg/g)	LOD Mn (µg/g)	Fe (µg/g)	2SE Fe (µg/g)	LOD Fe (µg/g)	Ni (µg/g)	2SE Ni (µg/g)	LOD Ni (µg/g)	Y (µg/g)	2SE Y (µg/g)	LOD Y (µg/g)	Mg#	depth (µm)
SC3-21-4 dp02	1	7.4602	0.144724	0.163752	286244	3095.22	7.69925	1.64247	0.0692077	0.0370992	112.164	3.05549	3.06803	556.533	6.0505	0.554837	122889	1291.16	70.7184	1518.36	15.6652	1.48895	0.0315138	0.0052589	0.00667959	0.842568	0.665218
	2	7.00076	0.167577	0.162168	291100	2788.37	7.62987	1.76697	0.057899	0.0367668	136.756	2.06951	3.04244	593.709	6.61298	0.549996	115535	1360.75	70.1104	1919.94	19.8744	1.47628	0.0259217	0.00479078	0.00662061	0.852707	1.99565
	3	6.53335	0.139168	0.167576	292992	3109.04	7.88975	2.05612	0.0684579	0.0380211	163.239	3.42224	3.14828	633.089	7.48969	0.5689	107743	1335.1	72.5298	2264.34	21.9462	1.52738	0.0197466	0.00402791	0.00684742	0.862035	3.32609
	4	6.06077	0.139838	0.167884	294070	2638.4	7.90967	2.33361	0.0641234	0.0381191	187.434	2.97014	3.15842	671.384	7.21653	0.570505	101317	1006.6	72.7441	2551.98	20.6604	1.53204	0.0186631	0.00411588	0.006866	0.869604	4.65652
	5	5.51985	0.112739	0.173874	301326	2966.12	8.19755	2.58561	0.0680365	0.0395086	204.235	3.84011	3.27568	724.602	6.6094	0.591446	95896.5	1217.41	75.4243	2741.43	26.2274	1.58864	0.0252359	0.00523123	0.00711723	0.878342	5.98696
	6	5.0453	0.124747	0.180797	298885	3480.08	8.52994	2.86814	0.0903608	0.0411127	213.21	3.54675	3.41093	753.879	9.47477	0.615614	89299.5	918.004	78.5168	2826.57	35.6602	1.65395	0.0245846	0.00529554	0.00740723	0.884929	7.31739
	7	4.60367	0.133391	0.179713	302364	3660.46	8.4846	3.04435	0.0794968	0.0408963	217.88	3.80627	3.39518	795.737	10.2552	0.612524	83553.3	1094.53	78.1331	2890.58	35.4847	1.64603	0.0221117	0.00460565	0.00736925	0.892645	8.64783
	8	4.24483	0.118776	0.181062	305153	2973.98	8.554	3.17542	0.0907589	0.0412329	223.428	3.48756	3.4253	828.641	8.30191	0.617712	81279.8	974.016	78.8051	2922.59	29.3303	1.66036	0.0196713	0.0052198	0.00743089	0.896118	9.97826
	9	3.92116	0.0920495	0.191225	308089	3123.48	9.04032	3.36752	0.100363	0.0435795	222.667	3.7501	3.6226	861.477	10.1504	0.653026	77123.7	845.232	83.3214	2947.92	32.2051	1.75569	0.0216127	0.00460334	0.00785484	0.901755	11.3087
	10	3.57124	0.100143	0.188456	310165	2866.74	8.9155	3.4722	0.0821769	0.04298	220.34	4.08014	3.57508	876.902	9.11737	0.6442	74508.1	784.746	82.2061	2954.21	33.3471	1.73237	0.0219903	0.00402865	0.00774784	0.905347	12.6391
	11	3.30698	0.0929783	0.191875	308356	2822.14	9.08351	3.56046	0.0805657	0.0437923	222.664	3.96784	3.64507	902.355	8.37924	0.656538	71972.9	795.991	83.7918	2959.98	28.6211	1.76597	0.0250443	0.00610885	0.00789535	0.907783	13.9696
	12	3.0344	0.0879656	0.190593	309474	2837.15	9.02894	3.53485	0.0864142	0.0435314	220.227	4.12264	3.62571	927.678	10.5478	0.652785	70227.8	653.301	83.3239	2947.76	33.328	1.75629	0.0200956	0.00463752	0.00784938	0.910114	15.3
	13	2.91015	0.0865065	0.193719	309403	3038.61	9.18332	3.61775	0.0698743	0.0442781	221.405	4.08223	3.69035	934.805	12.2235	0.664147	68710.7	779.116	84.7855	2931.51	34.3356	1.78729	0.023238	0.0052609	0.00798511	0.911866	16.6304
	14	2.66492	0.0716244	0.192563	311143	3182.19	9.13491	3.65883	0.0879497	0.0440471	221.773	3.75559	3.67357	952.236	8.82176	0.660847	67996.7	623.032	84.3758	2963.7	29.6541	1.77885	0.0194889	0.0044366	0.00794455	0.913148	17.9609
	15	2.51593	0.0737271	0.198571	311881	3238.86	9.42636	3.57656	0.0796733	0.0454548	220.709	4.32593	3.79348	953.481	12.3086	0.682134	67123.6	756.379	87.1053	2937.82	29.9671	1.83659	0.0213101	0.00395561	0.00819956	0.914353	19.2913
	16	2.43093	0.0847685	0.196435	314097	2714.04	9.33121	3.70415	0.0967124	0.0449983	223.991	4.04158	3.75784	971.531	8.28785	0.675448	67131.4	542.987	86.2628	2957.78	30.0003	1.81902	0.0197263	0.00451802	0.00811831	0.914897	20.6217
	17	2.29999	0.0797465	0.191451	313490	2203.88	9.10073	3.75277	0.103126	0.0438892	227.859	4.66946	3.66769	976.376	7.9927	0.658963	66593	732.753	84.169	2980.92	25.8734	1.77507	0.0194632	0.00488894	0.0079193	0.915372	21.9522
	18	2.1752	0.0899997	0.187702	310024	3024.65	8.92865	3.61925	0.0754116	0.0430616	221.666	3.53526	3.60095	966.391	9.59048	0.646698	65522.7	617.647	82.6135	2932.53	26.2184	1.74246	0.0198167	0.00305287	0.00777104	0.915765	23.2826
	19	2.06881	0.0618245	0.188312	312027	2186.66	8.96385	3.63696	0.0855745	0.0432337	225.608	3.34819	3.61779	984.434	8.78767	0.649444	66045.3	542.066	82.9756	2973.01	29.9071	1.75029	0.0198117	0.00437309	0.00780317	0.915649	24.613
	20	1.953	0.0920478	0.191067	310406	2783.01	9.10126	3.68429	0.0903785	0.0438988	219.128	4.07009	3.67593	976.98	9.18142	0.659599	65741.7	627.305	84.2844	2952.84	35.7025	1.77811	0.0192707	0.00408588	0.0079243	0.915602	25.9435
	21	1.83508	0.0730076	0.199418	311376	3235.38	9.50573	3.6695	0.0873255	0.0458522	221.059	5.19328	3.84217	970.337	8.41318	0.689125	65342.6	702.824	88.0696	2914.08	24.7645	1.85818	0.0155275	0.0057444	0.00827808	0.916311	27.2739
	22	1.90553	0.0843221	0.199877	314419	2973.81	9.53401	3.64103	0.0886646	0.045991	224.061	3.96403	3.85636	986.317	10.8573	0.69138	65666.9	547.868	88.3693	2945.23	28.1495	1.86472	0.0180522	0.00578938	0.00830426	0.916677	28.6044
	23	1.74425	0.0817439	0.199765	316717	3177.21	9.53546	3.79619	0.08307	0.0460005	223.541	2.83244	3.85989	1004.3	11.4187	0.691701	66281.3	545.087	88.4229	2989.48	31.7742	1.86607	0.0231922	0.00549662	0.00830717	0.916522	29.9348
	24	1.75386	0.0768395	0.19789	312378	3398.9	9.45264	3.75553	0.0818883	0.0456035	224.353	4.36598	3.82926	986.007	8.57282	0.685907	65903.7	666.876	87.6944	2959.64	33.8473	1.85092	0.0187885	0.00493288	0.00823664	0.915901	31.2652
	25	1.67635	0.0609172	0.197014	312405	2637.08	9.41716	3.68646	0.0774976	0.0454347	223.254	3.34976	3.81767	982.534	9.68552	0.683536	65270.7	588.195	87.403	2937.77	36.187	1.84499	0.0199505	0.00548368	0.00820727	0.916648	32.5957
a SE is calculated as follows: SE = SD / √n , where SD is the standard deviation of the measured concentrations of the element of interest within one layer, and n is the number of individual concentration determinations for the integrated signal of one layer (typically n > 50).
b Limits of detection (LOD) for each element and for each analysis were calculated as described in Howell et al. (2013), Chemical Geology, 355, 134-143.

[truncated: 4 more sheets: Table S11, Table S12, Fig. S1, Fig. S2]
